# Supplementary material for: Salt-Free Glycine Electrosynthesis via C−N Coupling Boosted by the Lattice Strain in Atomically Thin p-Block Bismuthene
Source: Research Square preprint supplement (doi:10.21203/rs.3.rs-7471908/v1), 2025-09-11
Supplement: Supplementary file 1 [file 31afb07ff228165b7b942817.docx]

**Supplementary Information**

**Salt-Free Glycine Electrosynthesis via C−N Coupling Boosted by the Lattice Strain in Atomically Thin *p*-Block Bismuthene**

Minghong Huang, [a, b] Sheng-Hua Zhou, [c] Cheng-Jie Yang, [d] Chung-Li Dong, [d] Lei Jiao, [e] Dong-Dong Ma, [b] Qi-Long Zhu *[b] and Zhenguo Huang *[a]

[a] Dr. M. Huang and Prof. Dr. Z. Huang
School of Civil and Environmental Engineering, University of Technology Sydney, Ultimo, New South Wales 2007, Australia
E-mail: zhenguo.huang@uts.edu.au

[b] Dr. M. Huang, Dr. D. Ma and Prof. Dr. Q. Zhu
State Key Laboratory of Structural Chemistry, Fujian Institute of Research on the Structure of Matter, Chinese Academy of Sciences (CAS), Fuzhou 350002, China
E-mail: qlzhu@fjirsm.ac.cn

[c] Dr. S. Zhou
School of Chemistry and Chemical Engineering, Jiangsu University of Technology, Changzhou 213001, China

[d] C. Yang and Dr. C. Dong
Department of Physics, Tamkang University, Tamsui 25137, Taiwan

[e] L. Jiao
State Key Laboratory of Physical Chemistry of Solid Surfaces, College of Chemistry and Chemical Engineering, Xiamen University, Xiamen 361005, China


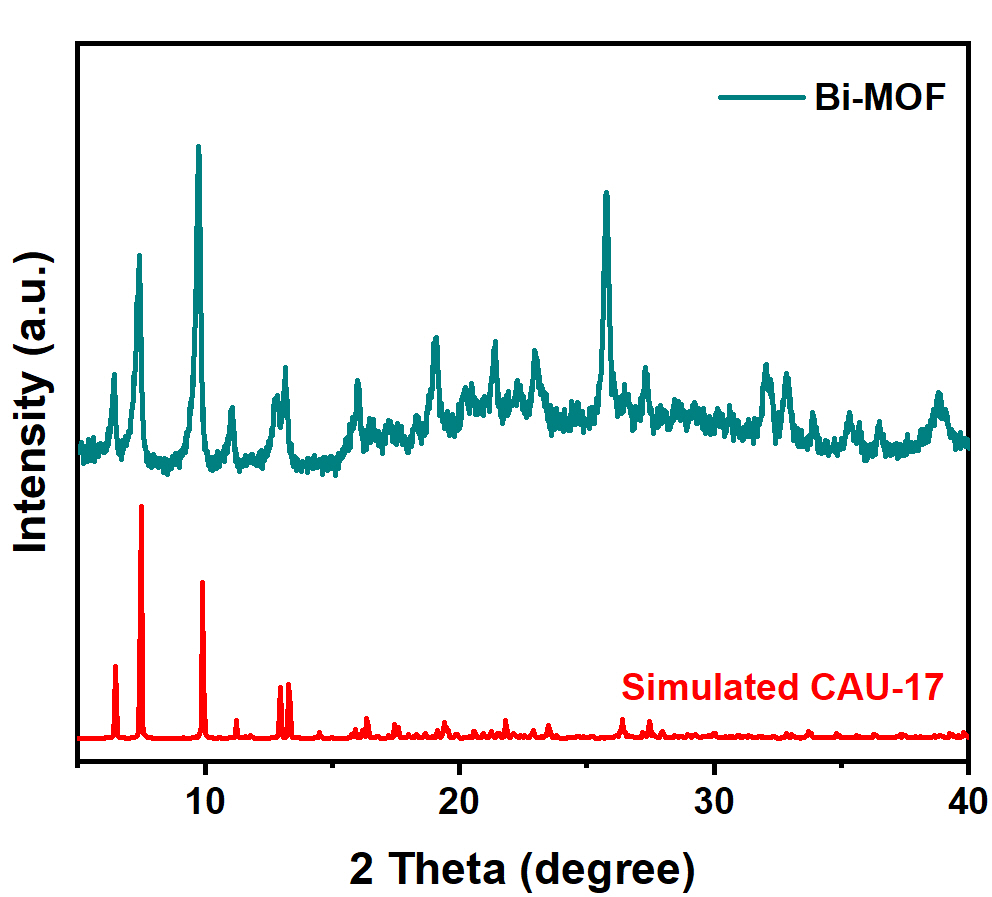


**Supplementary Fig. S1.** XRD pattern of the as-prepared Bi-CAU-17.


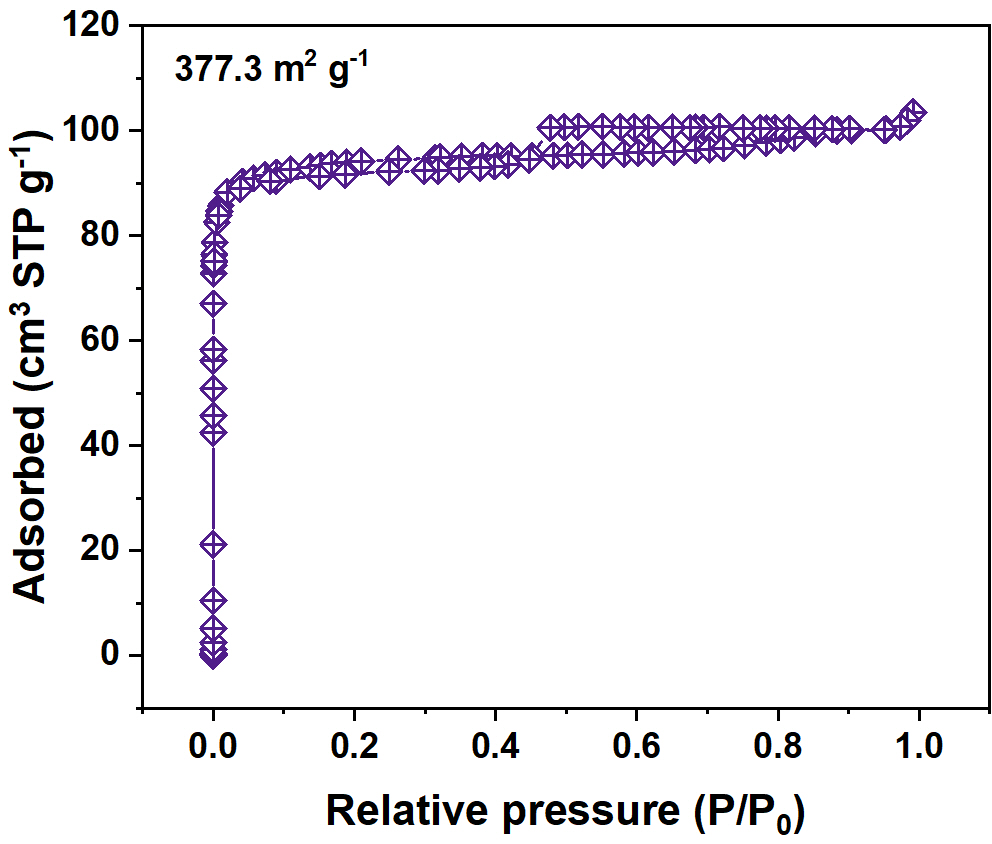


**Supplementary Fig. S2**. N2 sorption isotherm of Bi-CAU-17.


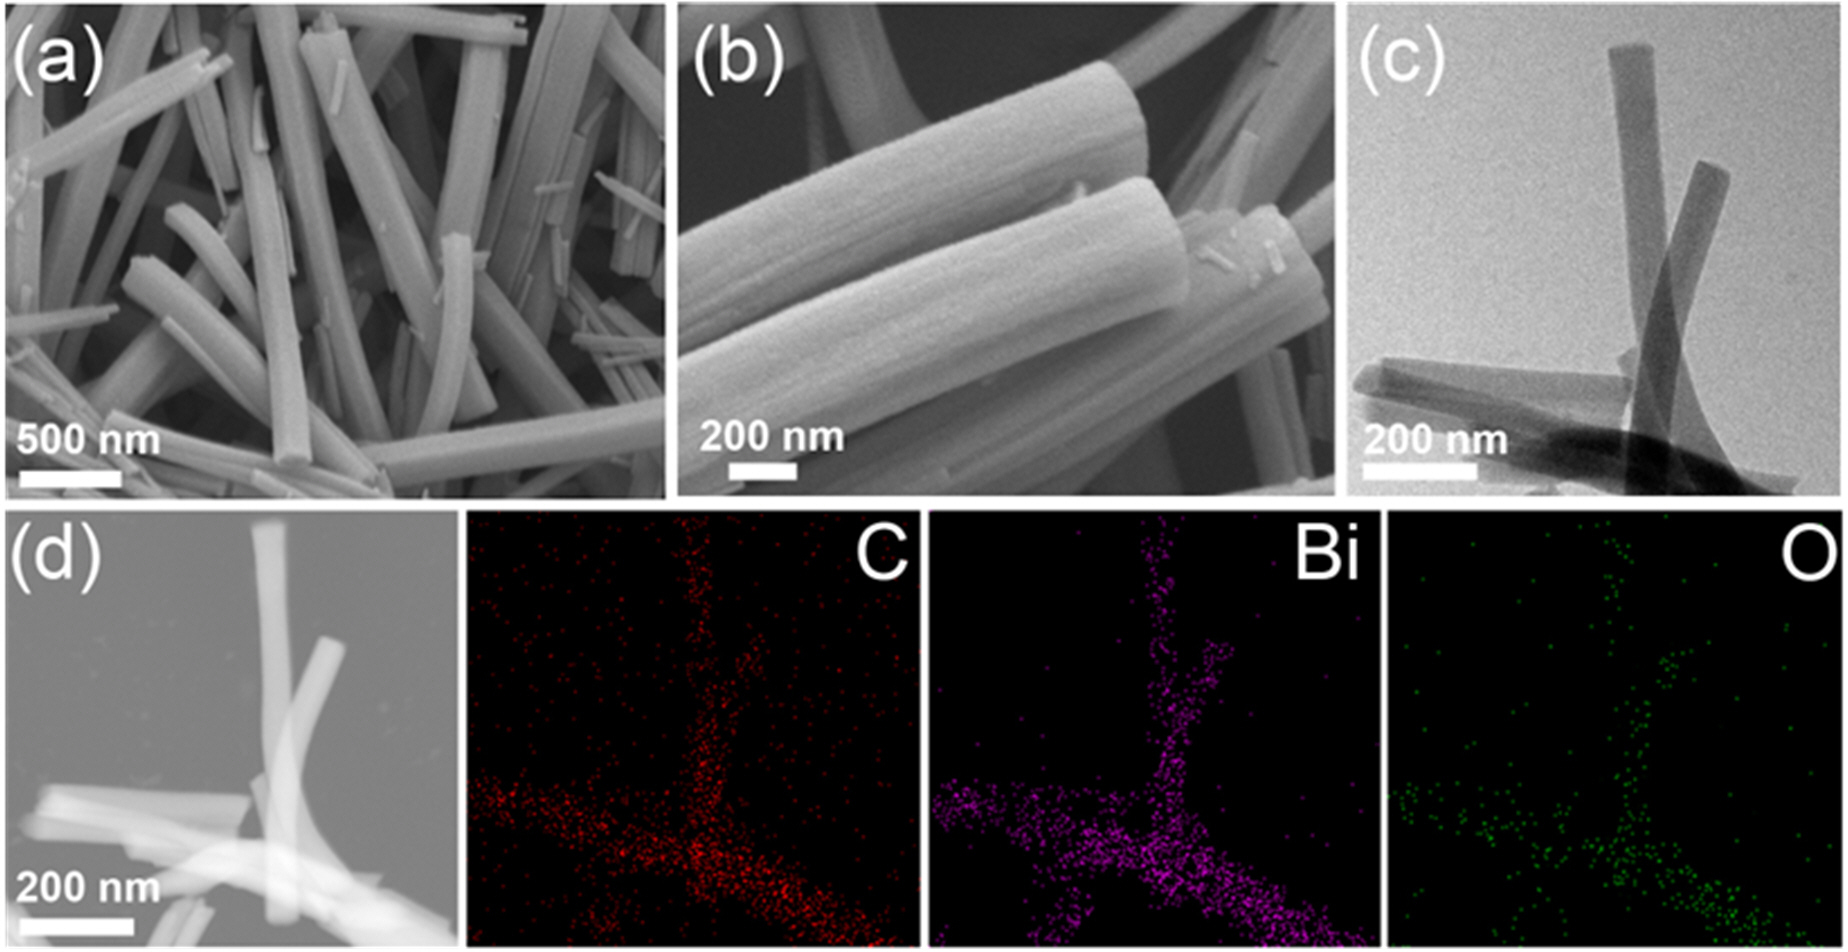


**Supplementary Fig. S3**. (a-b) SEM, (c) TEM and (d) EDX elemental mapping images of Bi-CAU-17.


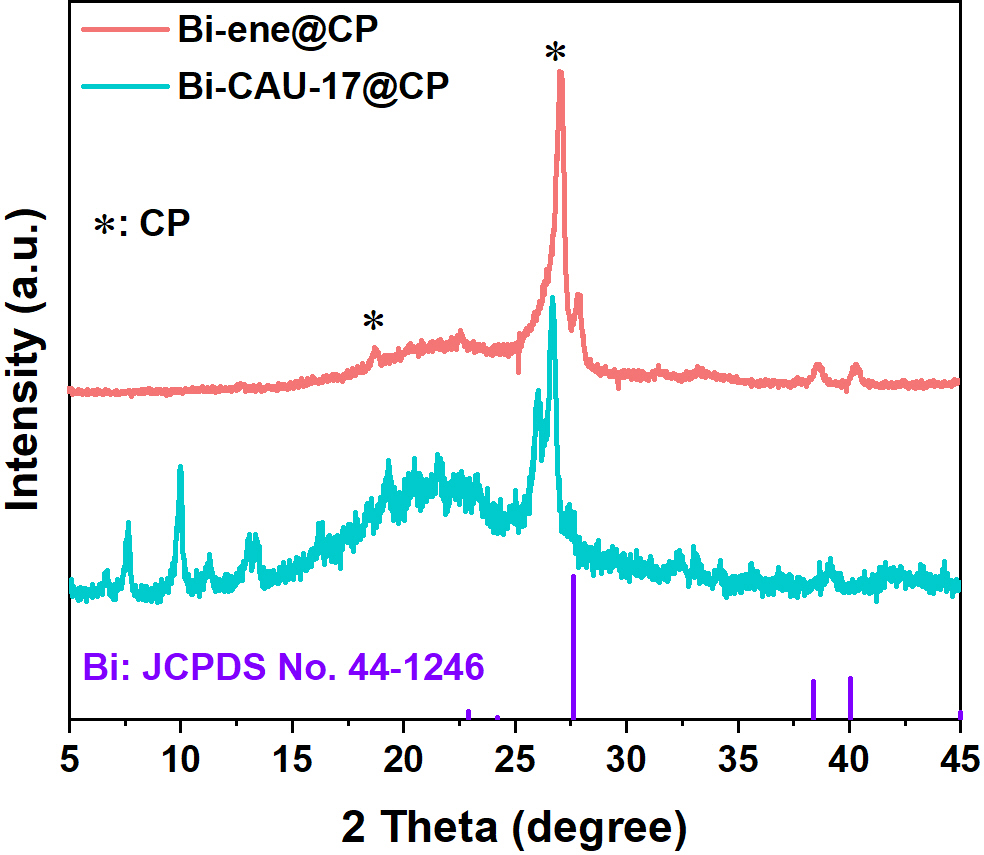


**Supplementary Fig. S4.** XRD patterns of Bi-CAU-17 and Bi-ene on carbon paper (CP).


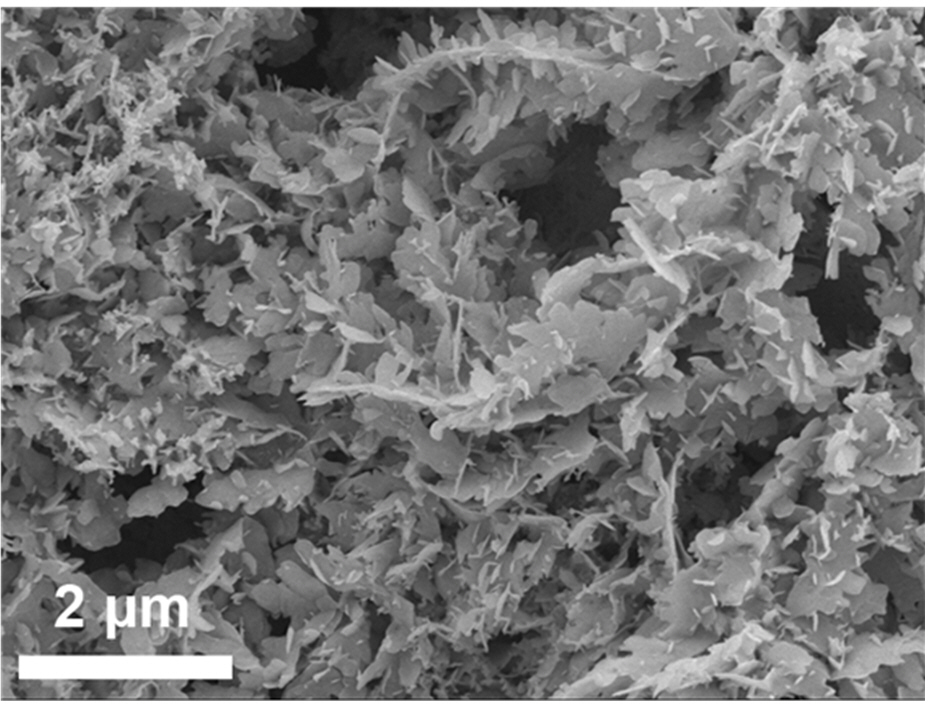


**Supplementary Fig. S5**. SEM image of Bi-ene obtained via electrochemical reduction of Bi-CAU-17.


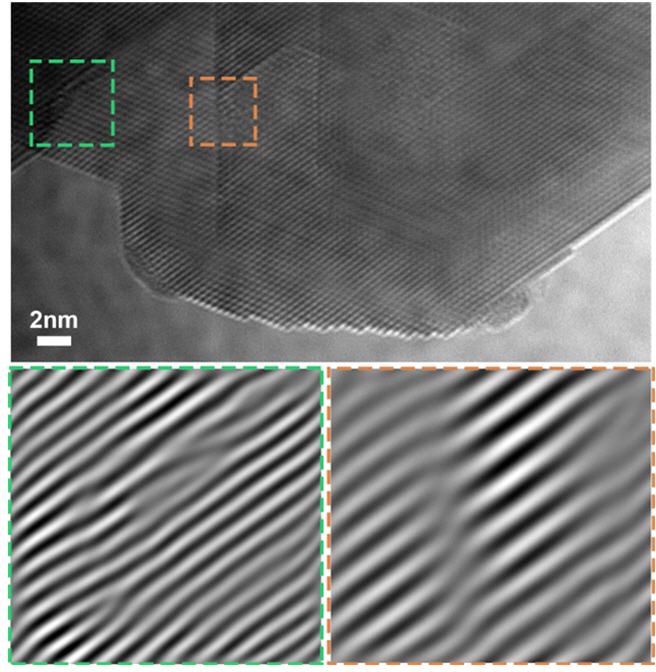


**Supplementary Fig. S6**. HR-TEM image of Bi-ene and the inverse FFT pattern generated from the green and orange dashed squares.


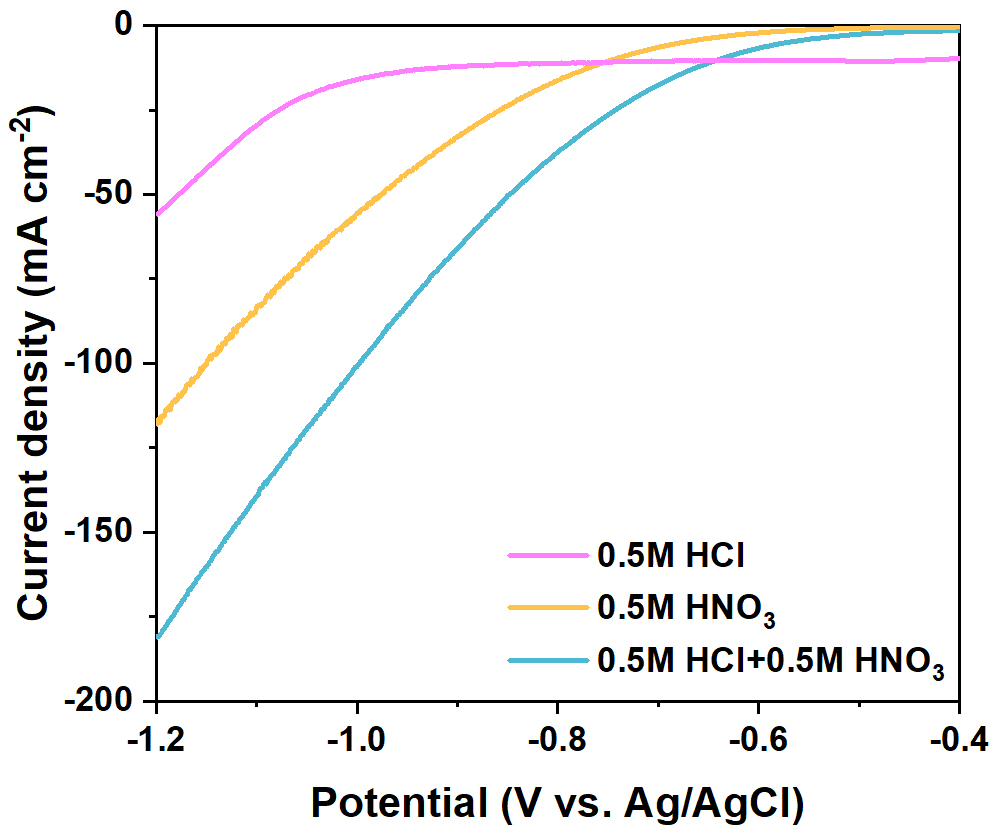


**Supplementary Fig. S7.** LSV curves for NtrRR in different electrolytes over the Bi-ene catalyst, with a scan rate of 10 mV s−1.


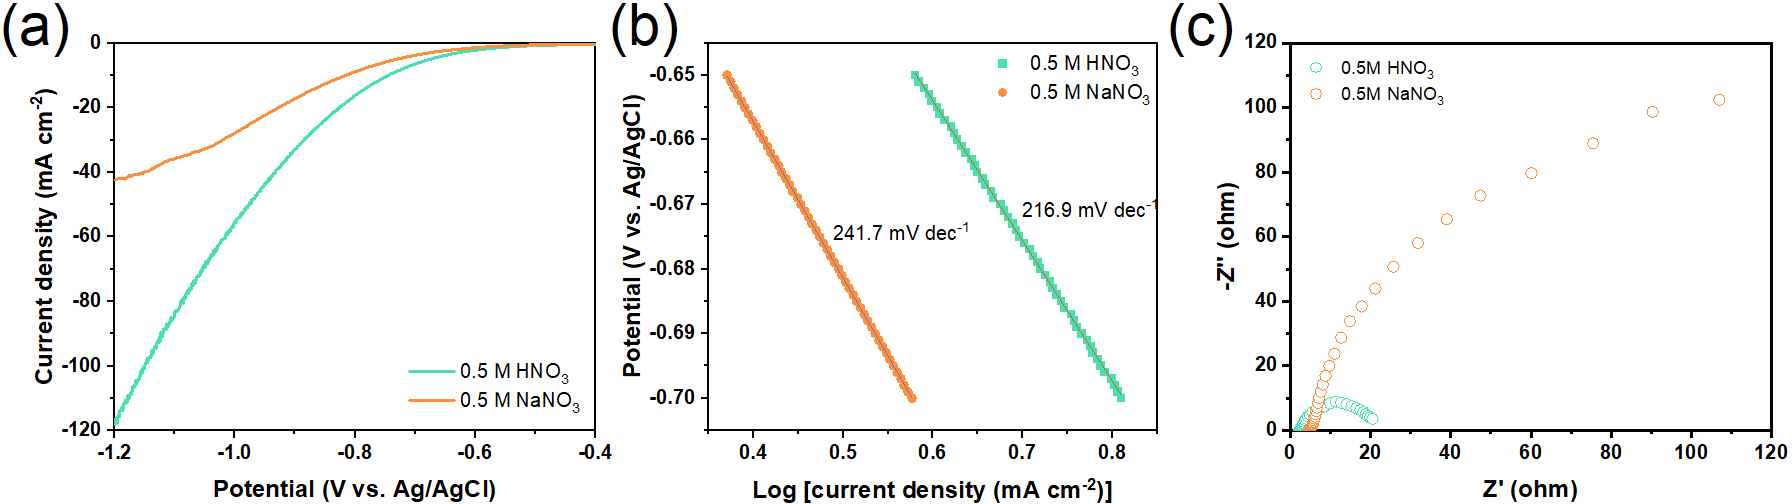


**Supplementary Fig. S8.** (a) LSV curves, (b) Tafel curves and (c) Nyquist plots for NtrRR over Bi-ene in 0.5 M HNO3 and 0.5 M NaNO3.


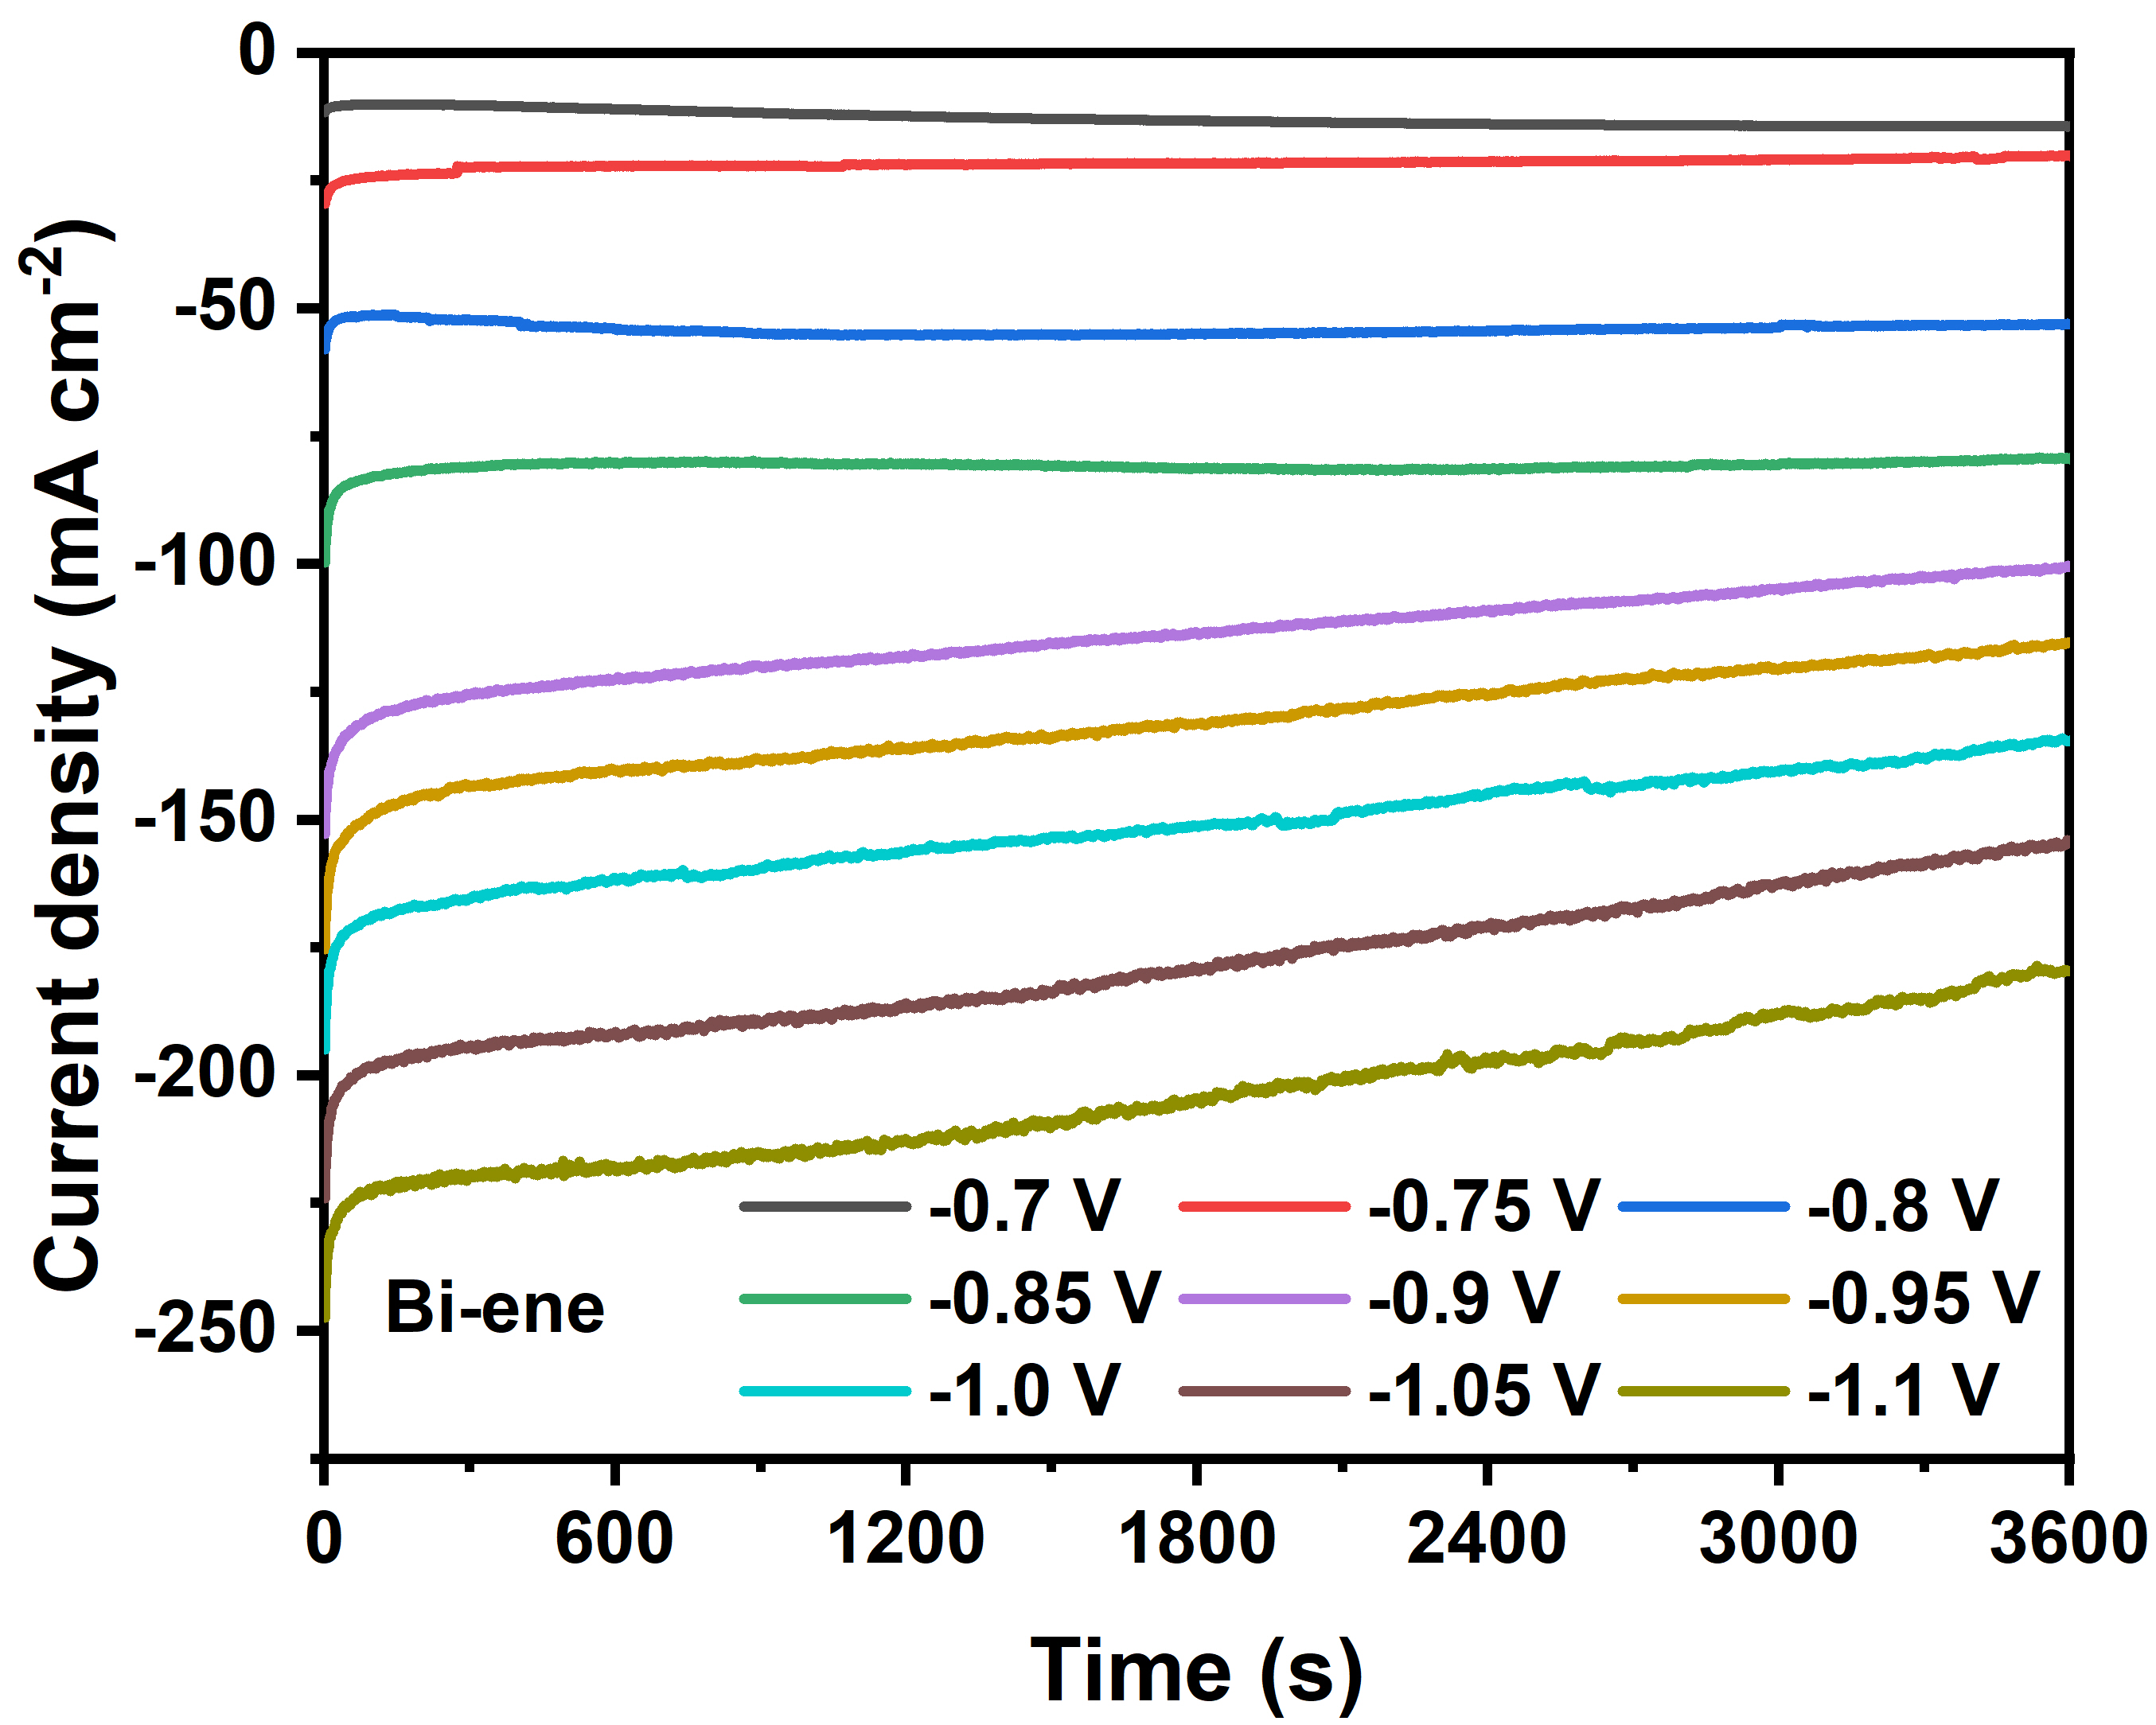


**Supplementary Fig. S9.** I-t curves for NtrRR over the Bi-ene catalyst in 0.5 M HCl + 0.5 M HNO3.


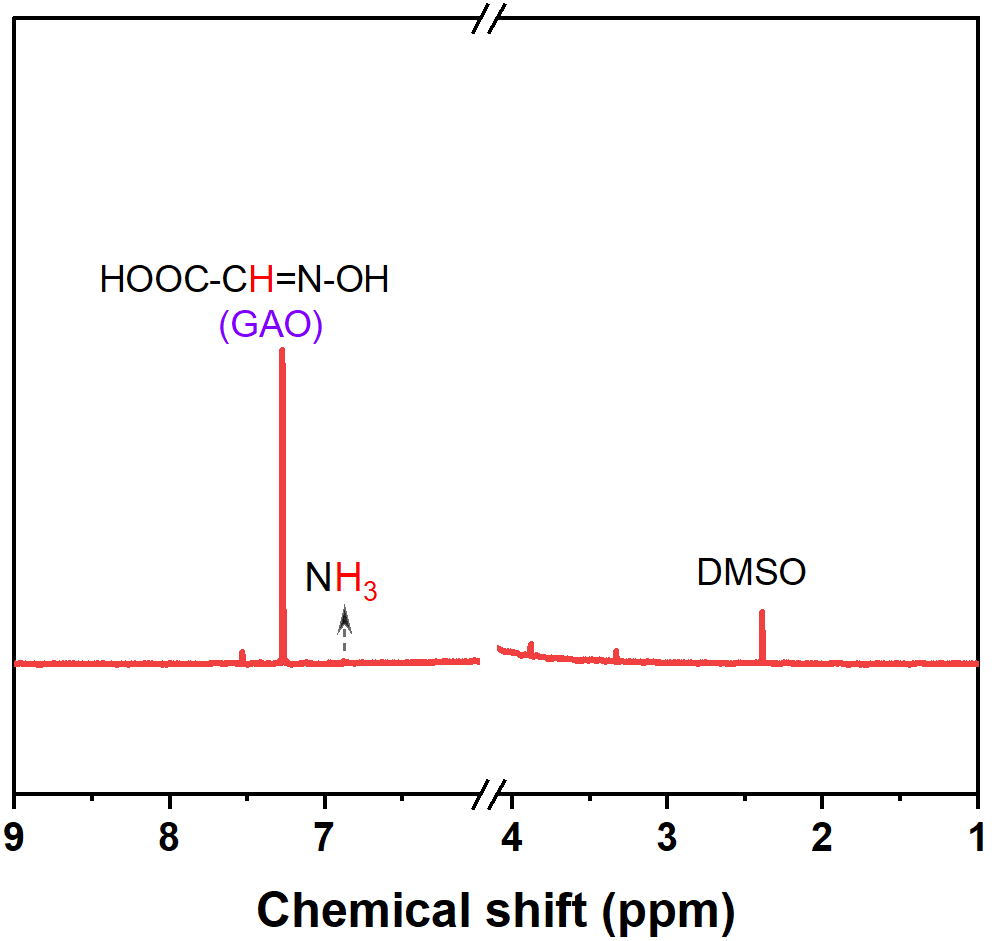


**Supplementary Fig. S10.** 1H HMR spectrum of the electrolyte after the 1 h continuous NtrRR with the addition of GX. The liquid product NH2OH was quantified by reacting it with excess amount of GXthrough oximation.


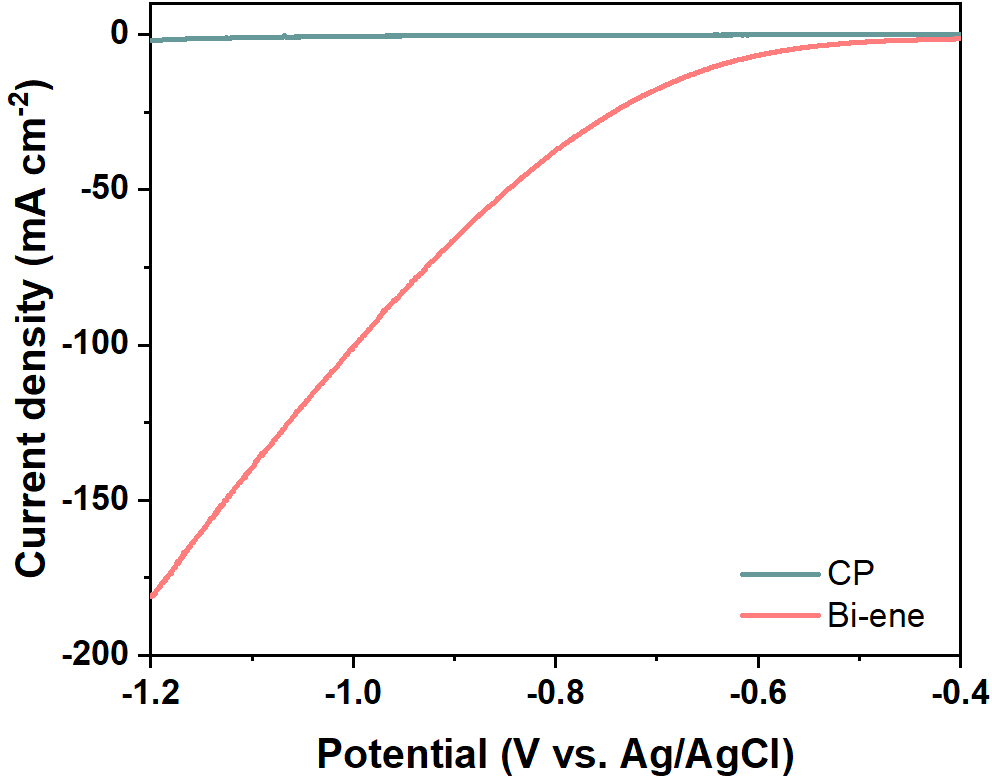


**Supplementary Fig. S11.** LSV curves for NtrRR over carbon paper (CP) and Bi-ene catalyst in 0.5 M HCl +0.5 M HNO3.


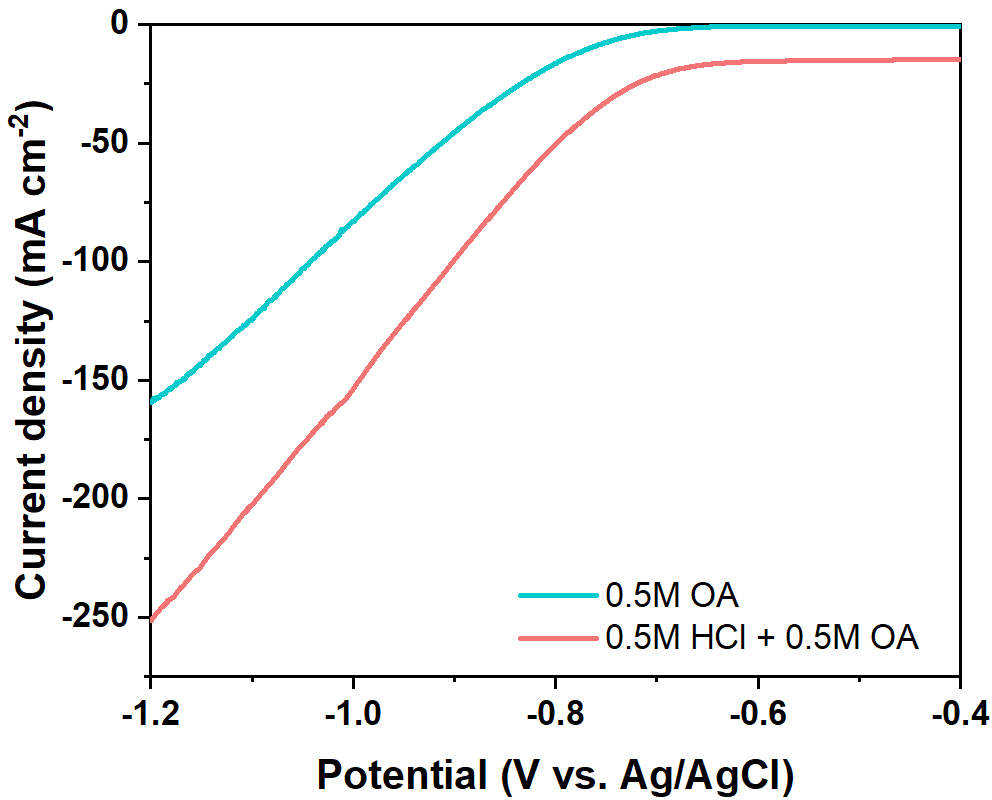


**Supplementary Fig. S12.** LSV curves for OARR in different electrolytes over Bi-ene catalyst.


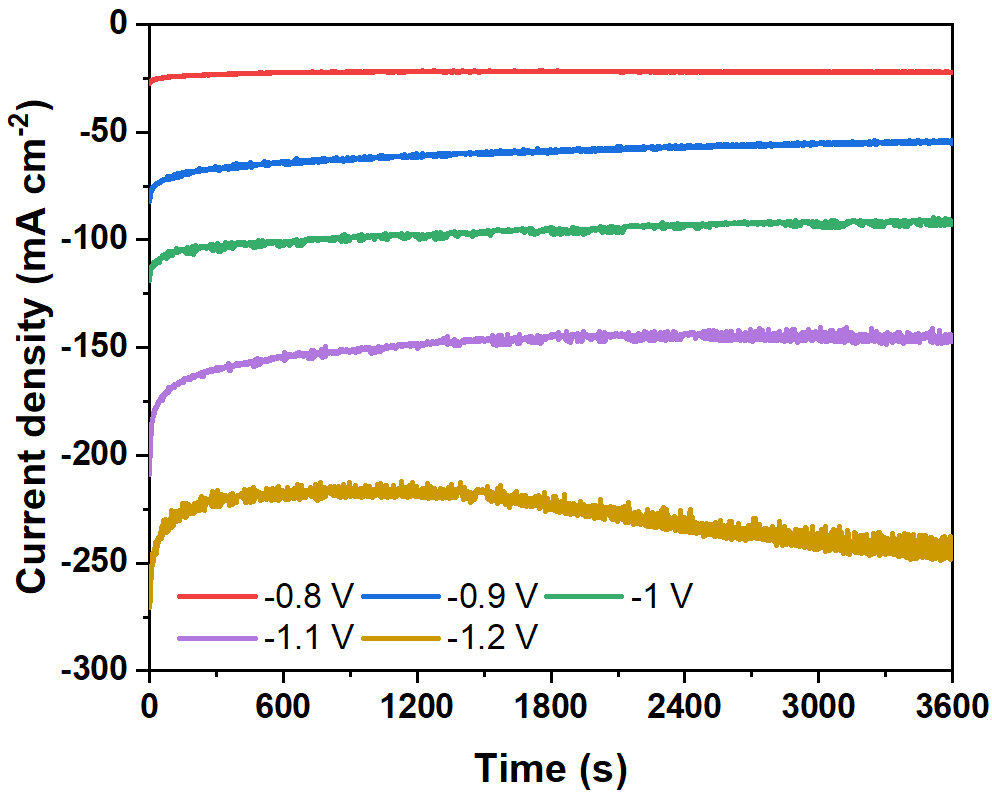


**Supplementary Fig. S13.** I-t curves for OARR over Bi-ene catalyst in 0.5 M HCl +0.5 M OA.


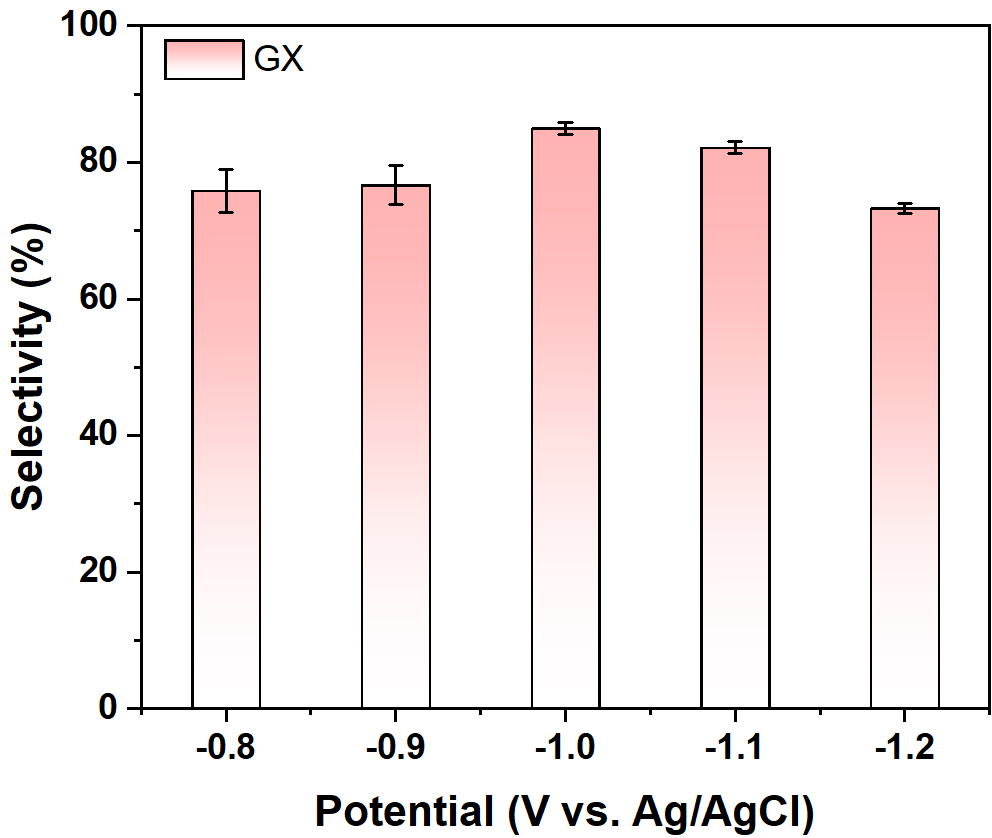


**Supplementary Fig. S14.** The selectivity for GX at different potentials over Bi-ene catalyst.


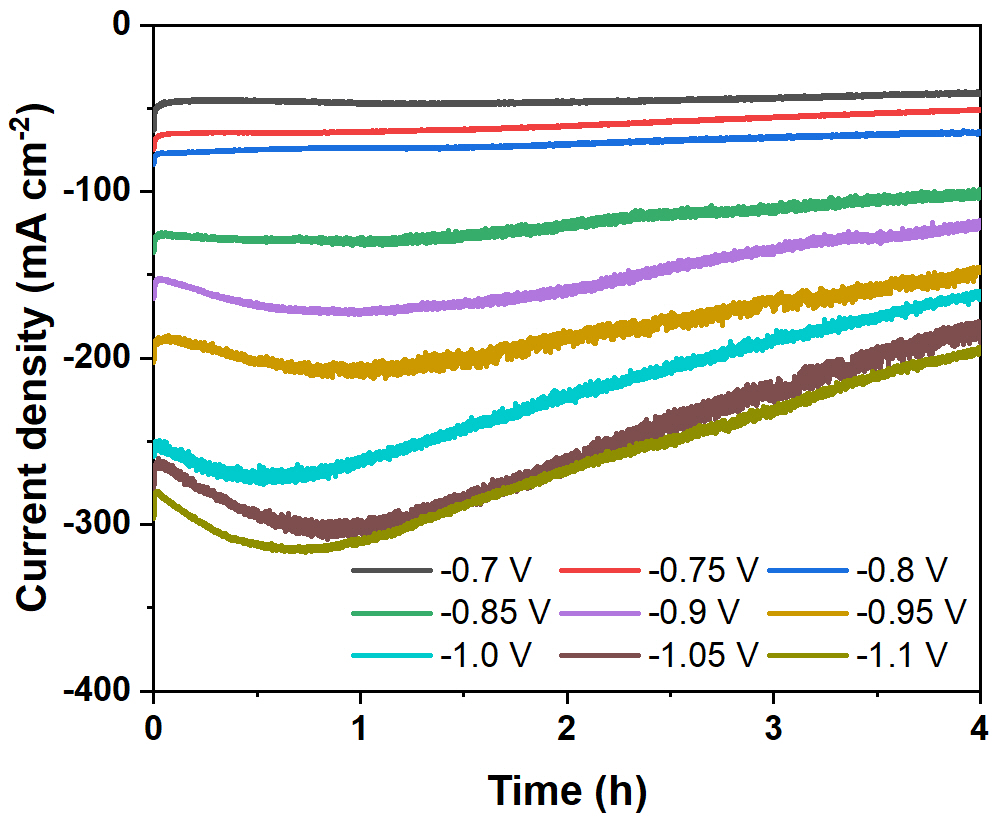


**Supplementary Fig. S15.** I-t curves for the co-reduction of OA and HNO3 over Bi-ene catalyst in 0.5 M HCl + 0.5 M HNO3 + 0.5 M OA.


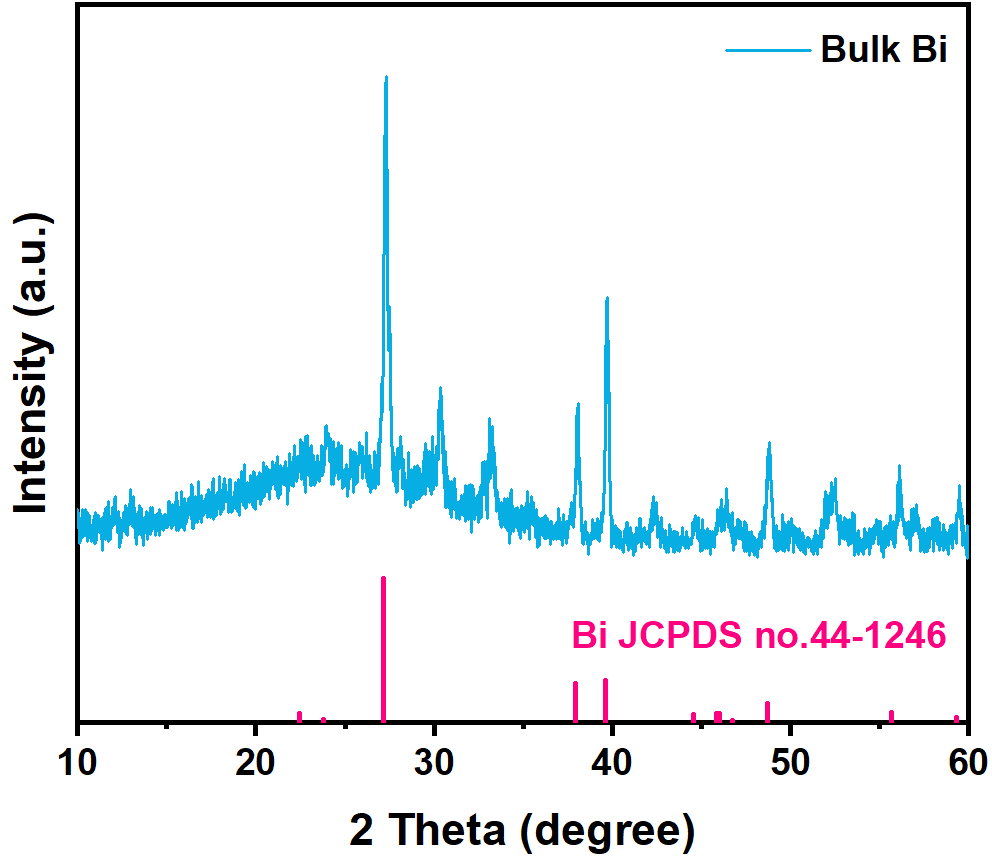


**Supplementary Fig. S16**. XRD pattern of bulk-Bi.


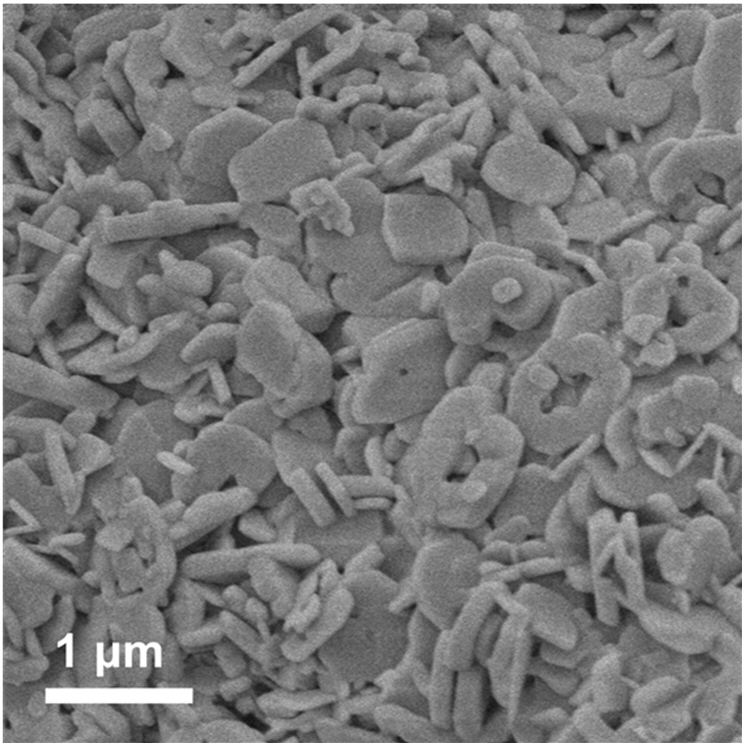


**Supplementary Fig. S17**. SEM image of bulk-Bi with microparticle morphology.


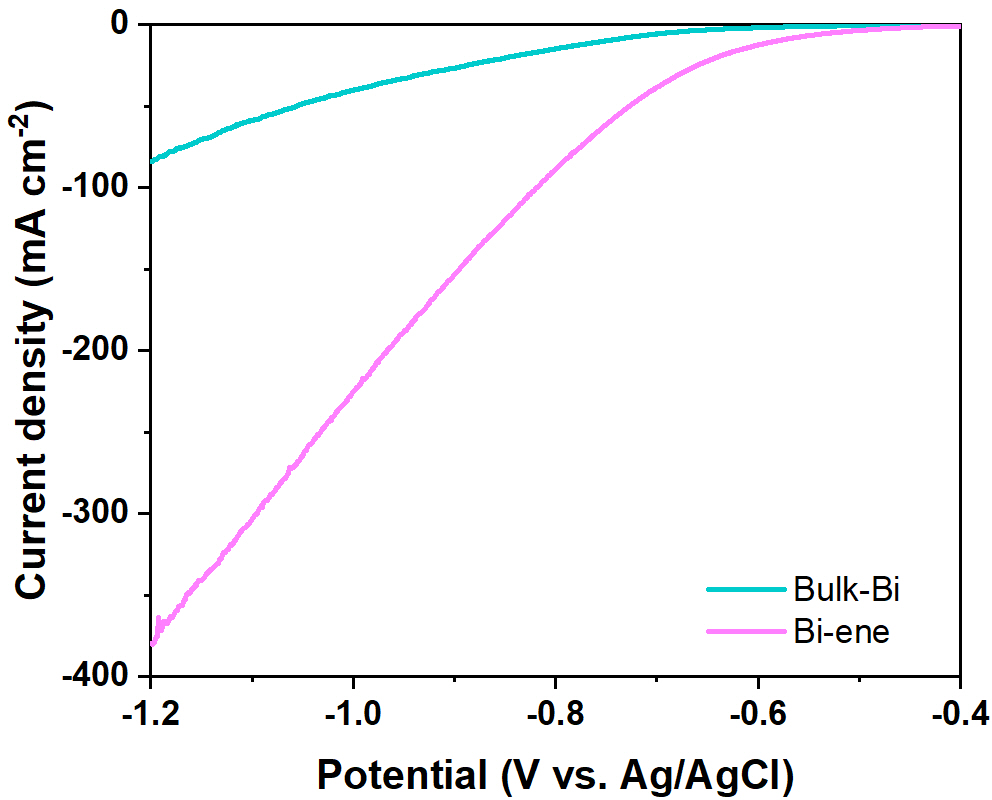


**Supplementary Fig. S18.** Comparison of LSV curves between Bi-ene and bulk-Bi in 0.5 M HCl + 0.5 M HNO3 + 0.5 M OA.


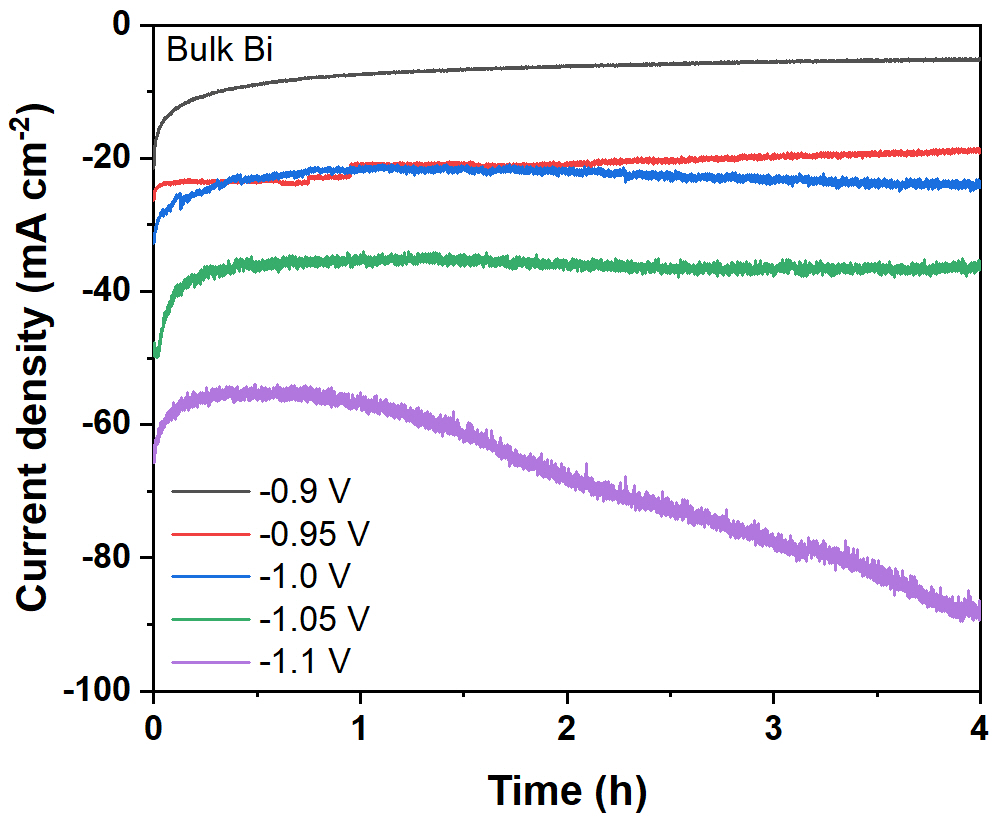


**Supplementary Fig. S19.** I-t curves for co-reduction of OA and HNO3 over bulk-Bi catalyst in 0.5 M HCl + 0.5 M HNO3 + 0.5 M OA.


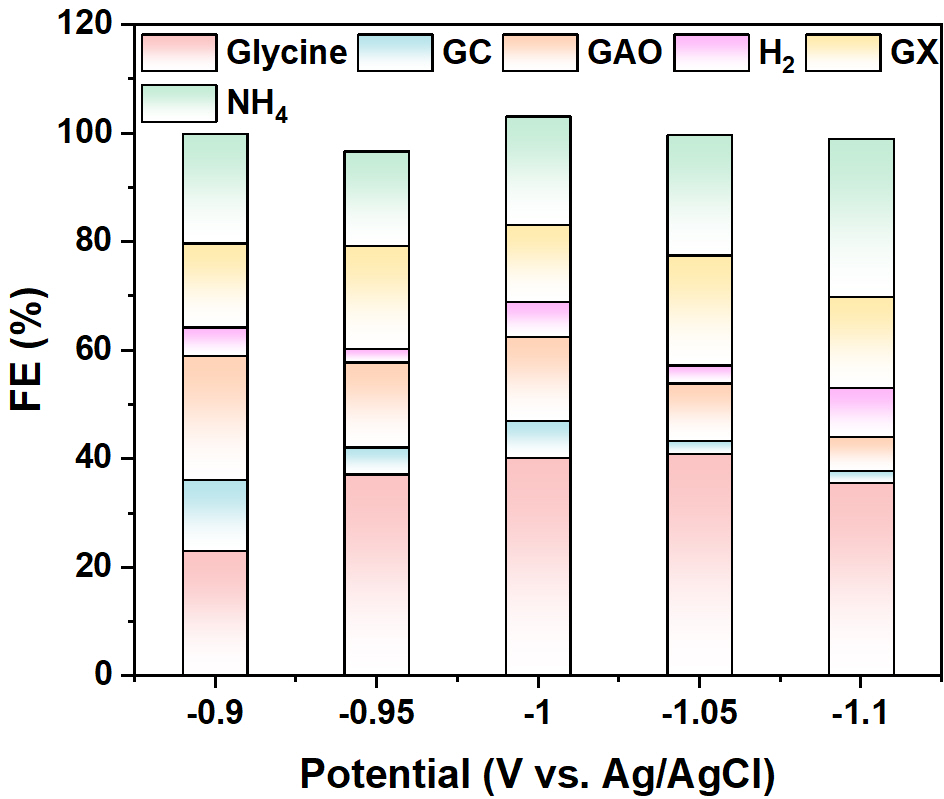


**Supplementary Fig. S20.** FEs of different products over bulk-Bi at different potentials in 0.5 M HCl + 0.5 M HNO3 + 0.5 M OA.


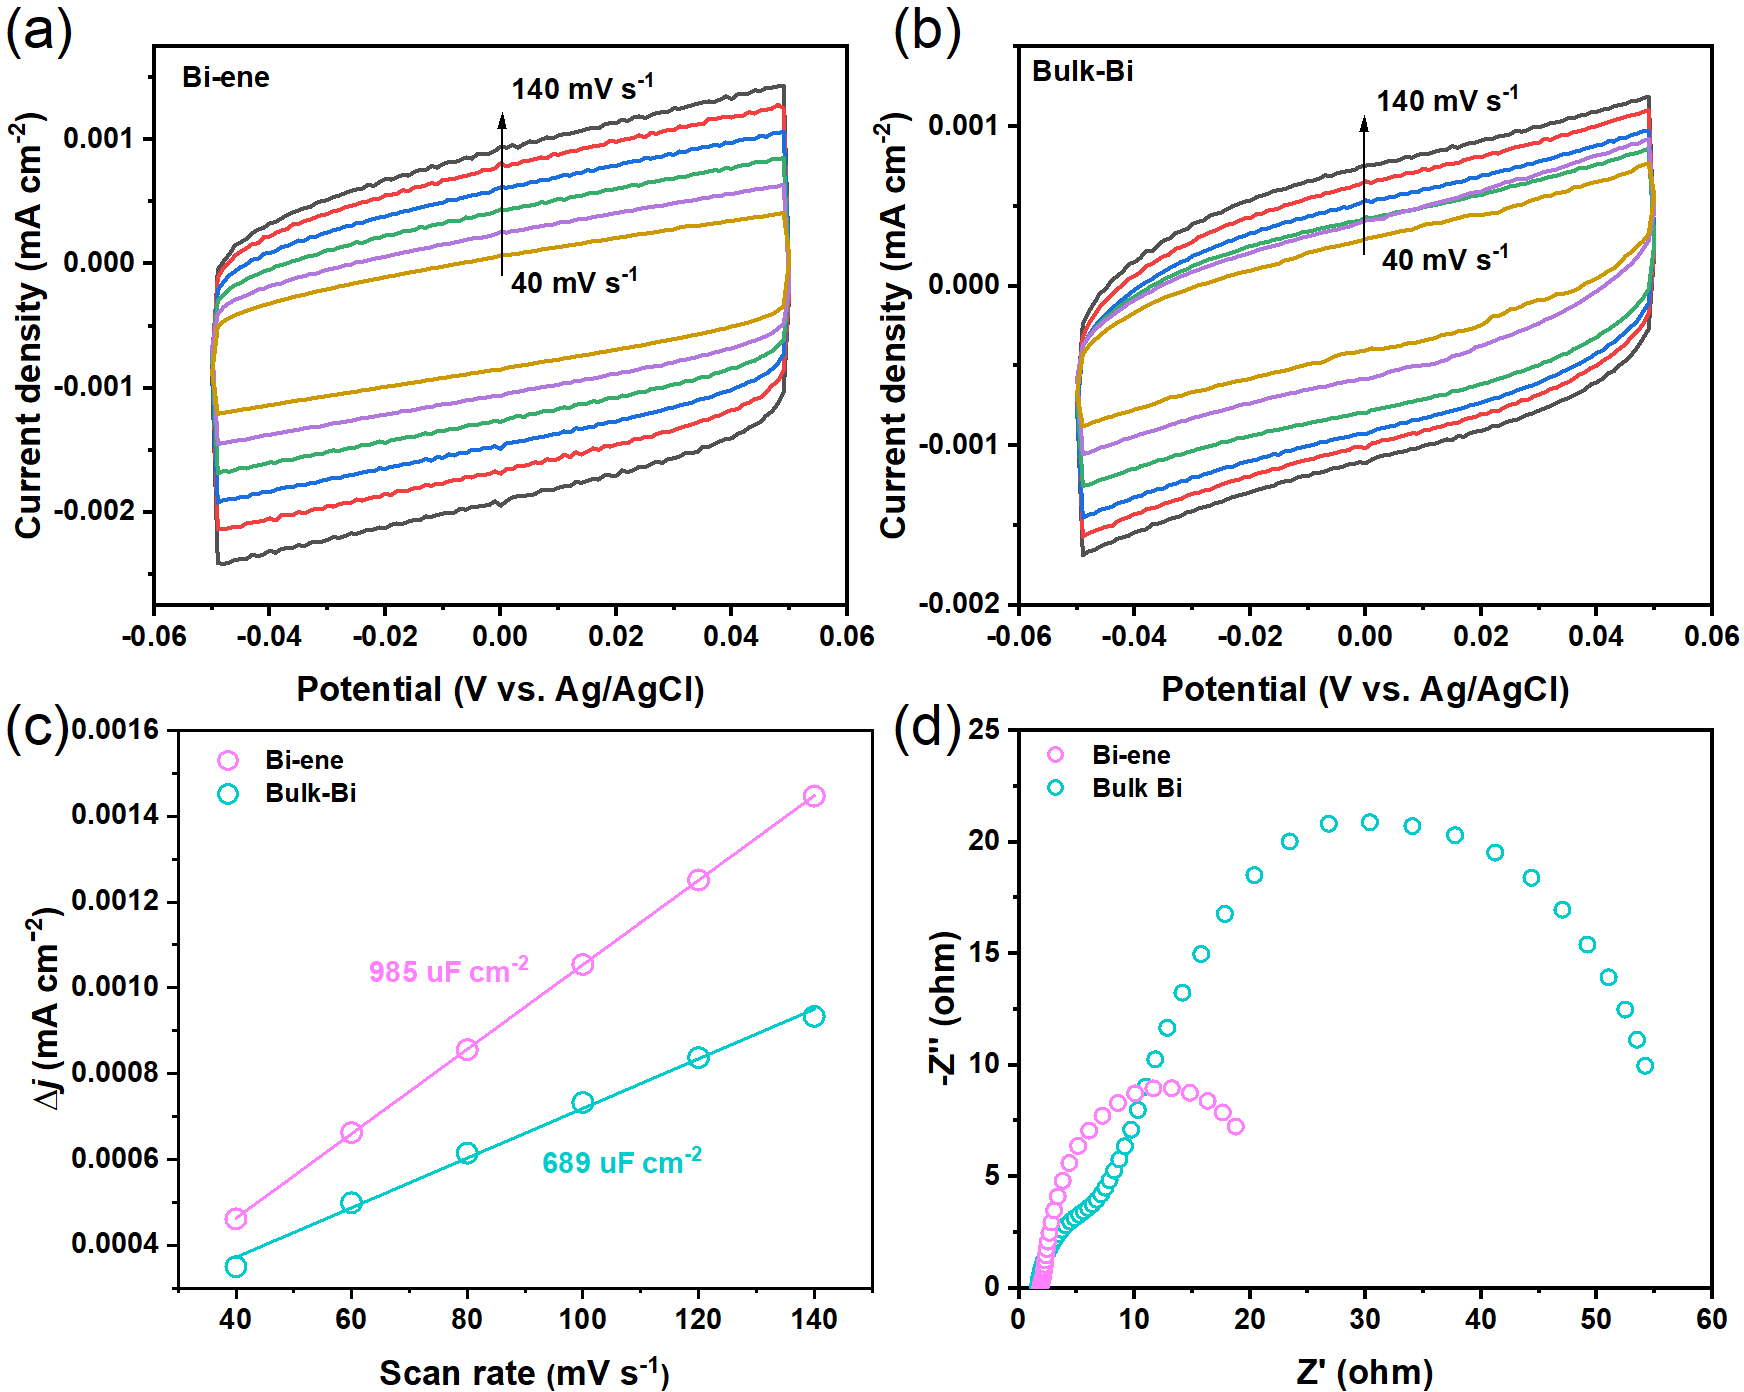


**Supplementary Fig. S21.** ECSA measurements for Bi-ene and bulk-Bi. (a, b) CV curves at different scan rates, (c) capacitive ▽*j*=(*j*a-*j*c) against scan rates, (d) electrochemical impedance plots for Bi-ene and bulk-Bi.


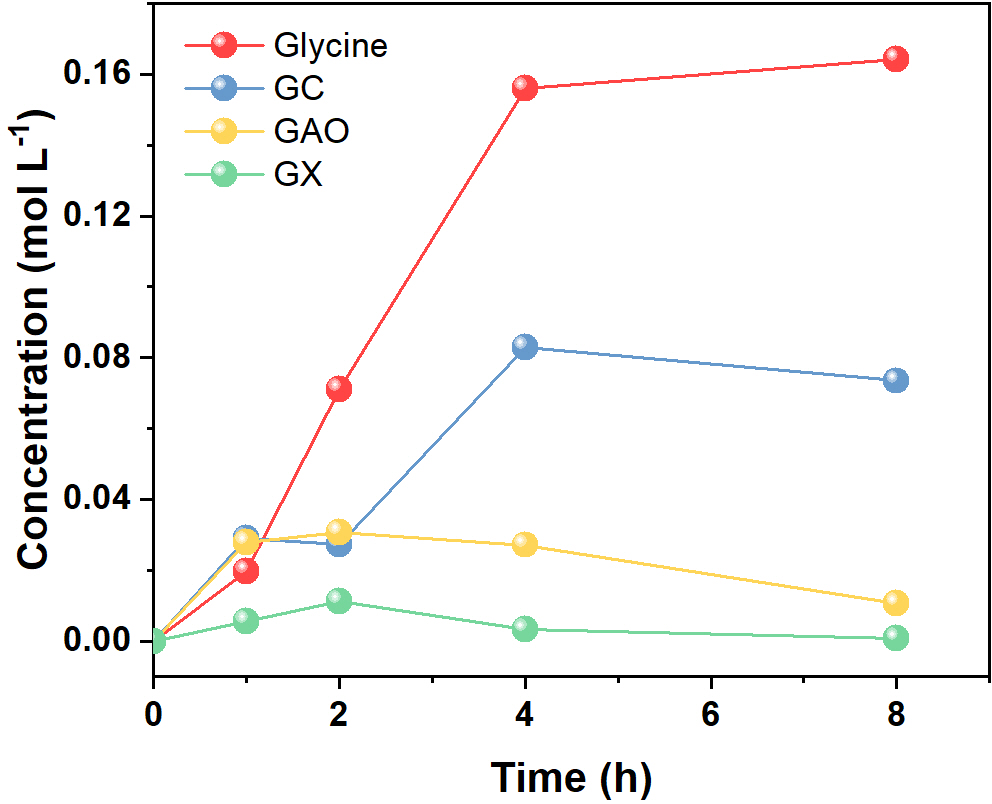


**Supplementary Fig. S22.** Time-dependence of concentration of diﬀerent products at the potential of −0.95 V in 0.5 M HCl + 0.5 M HNO3 + 0.5 M OA.


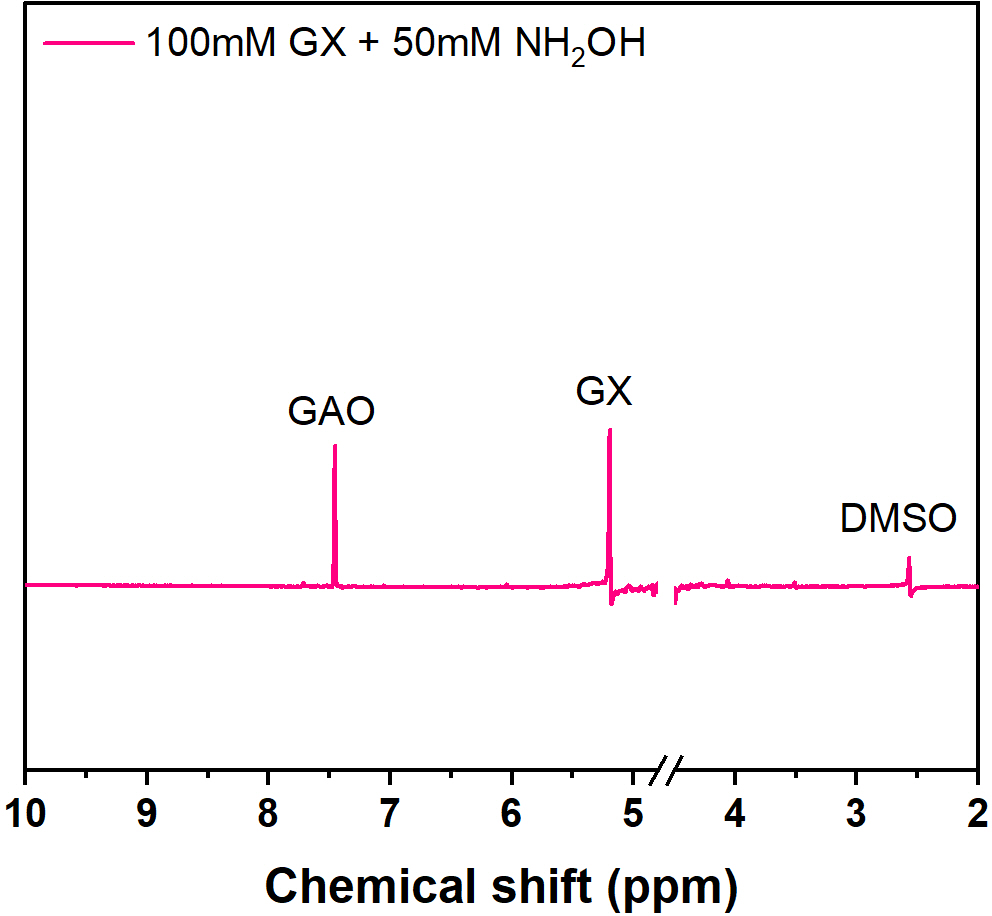


**Supplementary Fig. S23**. 1H NMR spectrum after mixing 100 mM of GX with 50 mM of NH2OH.


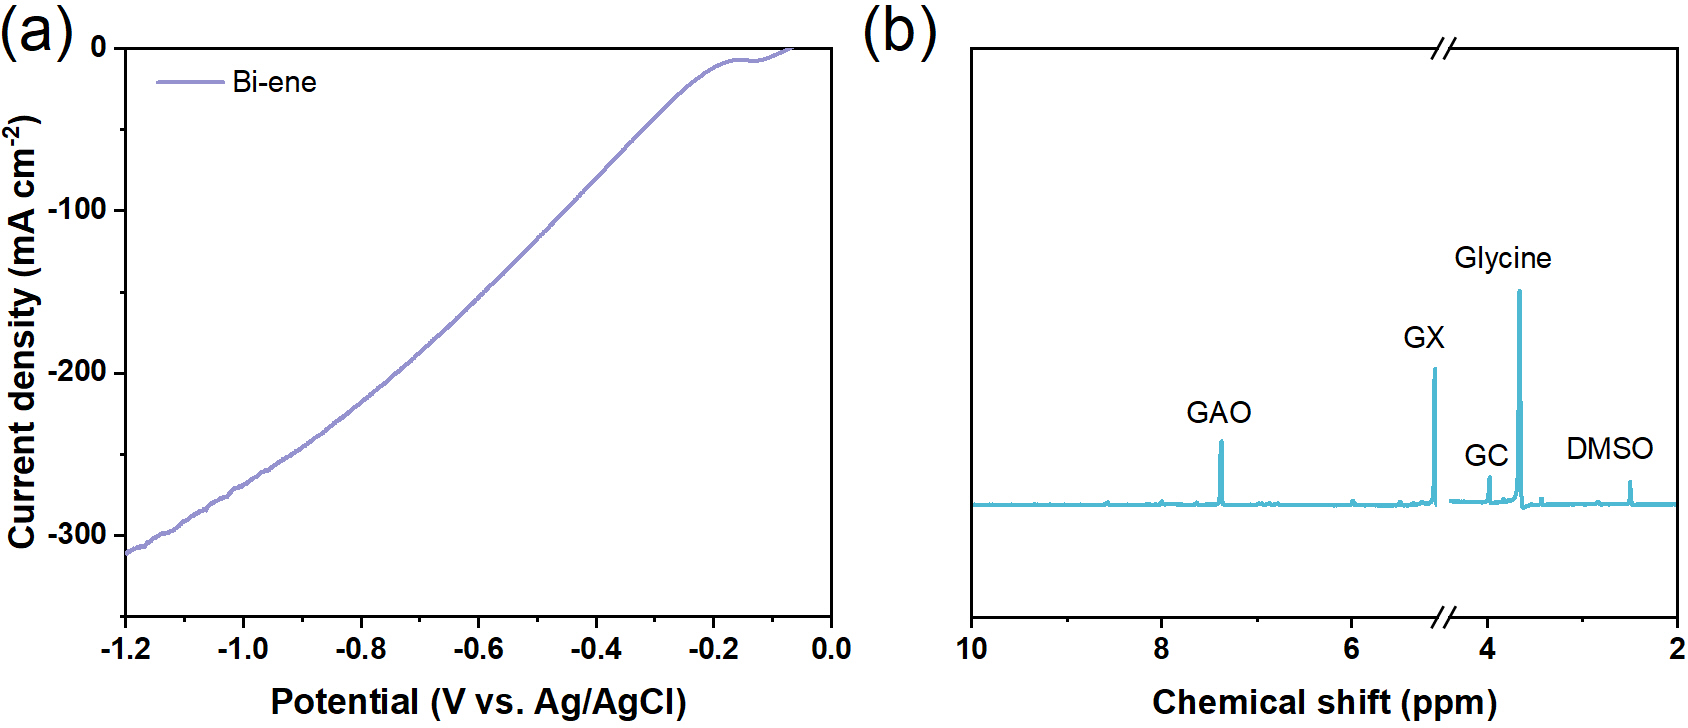


**Supplementary Fig. S24.** (a) LSV curve and (b) 1H NMR spectrum of electrolyte by using Bi-ene electrode after 4 h electrolysis in 0.5 M GX + 0.5 M NH2OH·HCl.


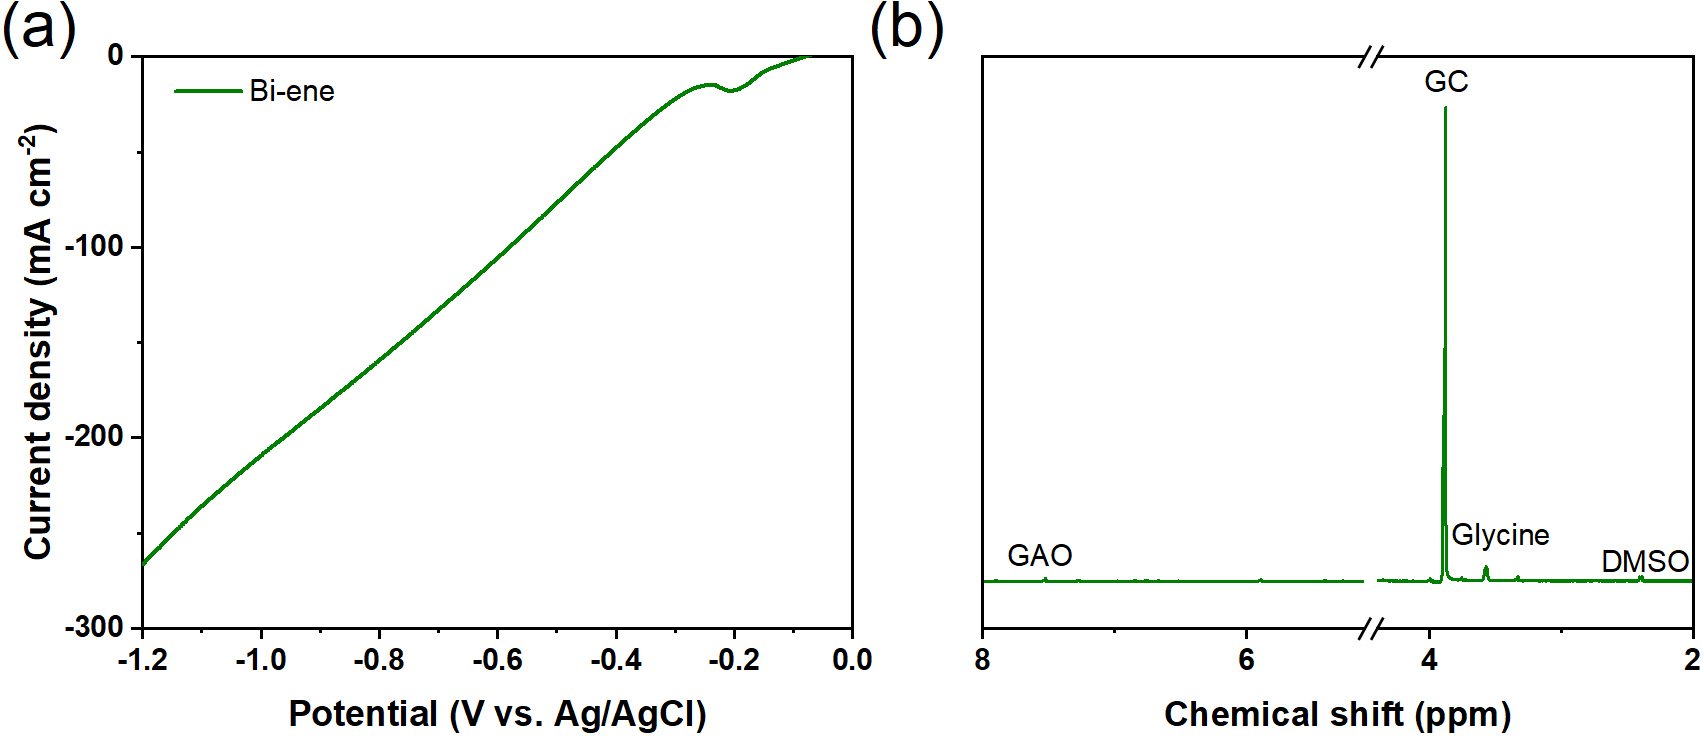


**Supplementary Fig. S25.** (a) LSV curve and (b) 1H NMR spectrum of electrolyte by using Bi-ene electrode after 4 h electrolysis in 0.5 M HCl + 0.5 M HNO3 + 0.5 M GX.


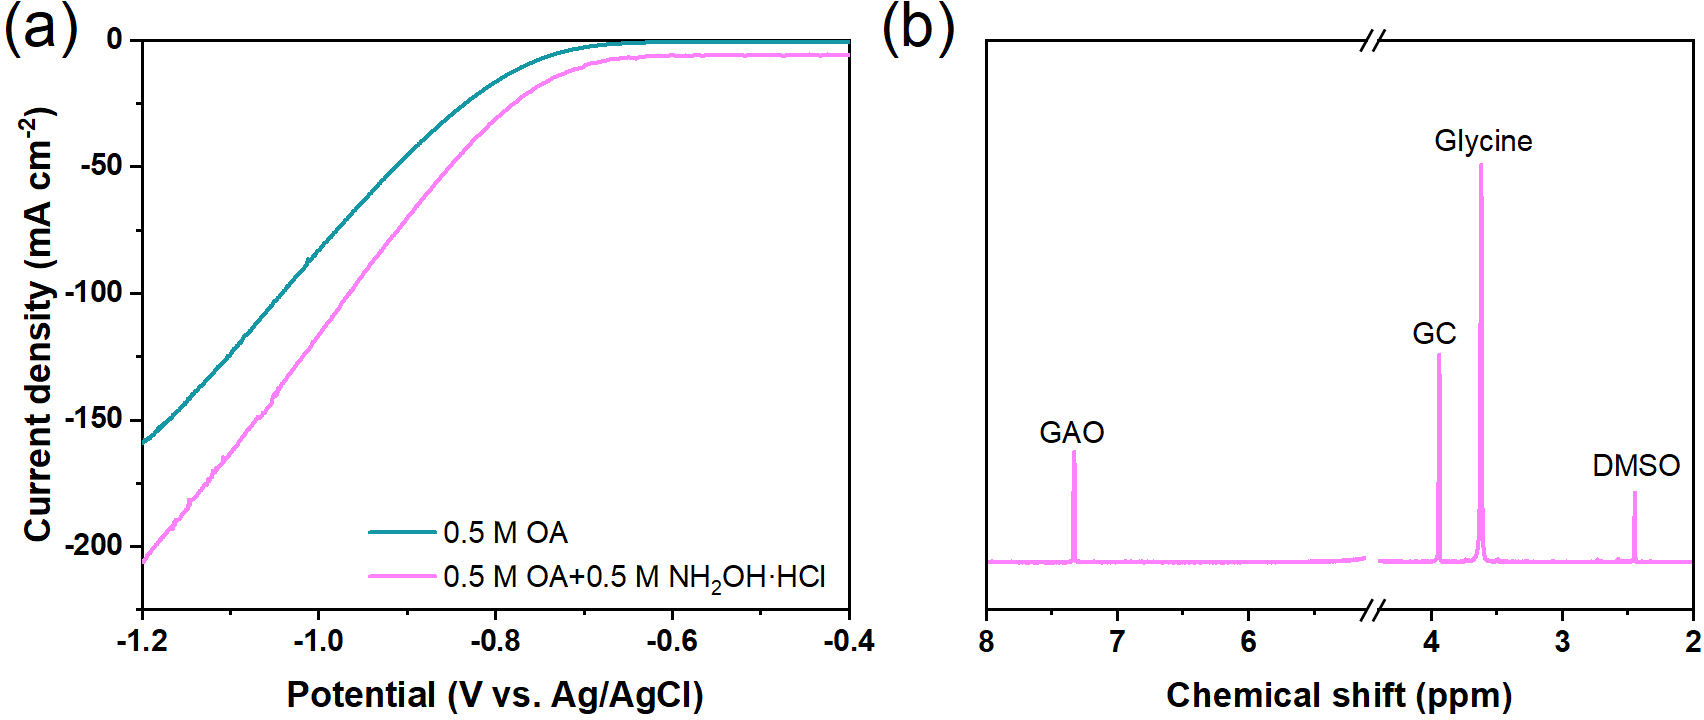


**Supplementary Fig. S26.** (a) LSV curve and (b) 1H NMR spectrum of electrolyte by using Bi-ene electrode after 4 h electrolysis in 0.5 M OA + 0.5 M NH2OH·HCl.


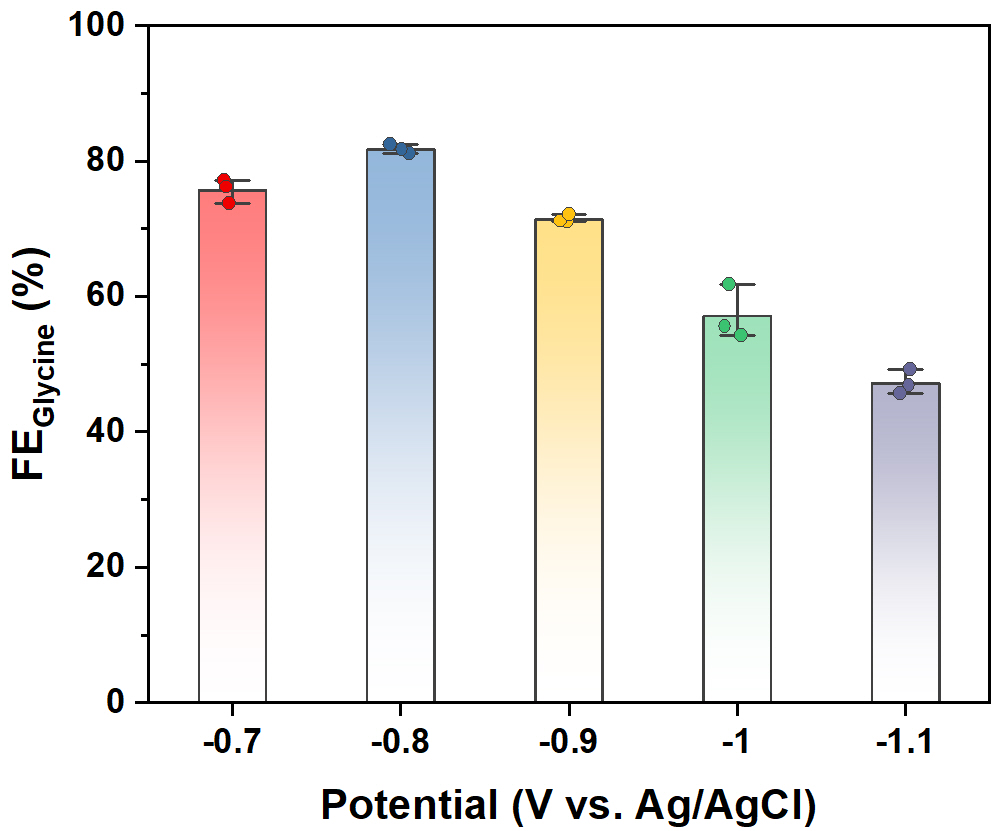


**Supplementary Fig. S27.** FEs of glycine at different potentials over Bi-ene in 0.5 M OA + 0.5 M NH2OH·HCl.


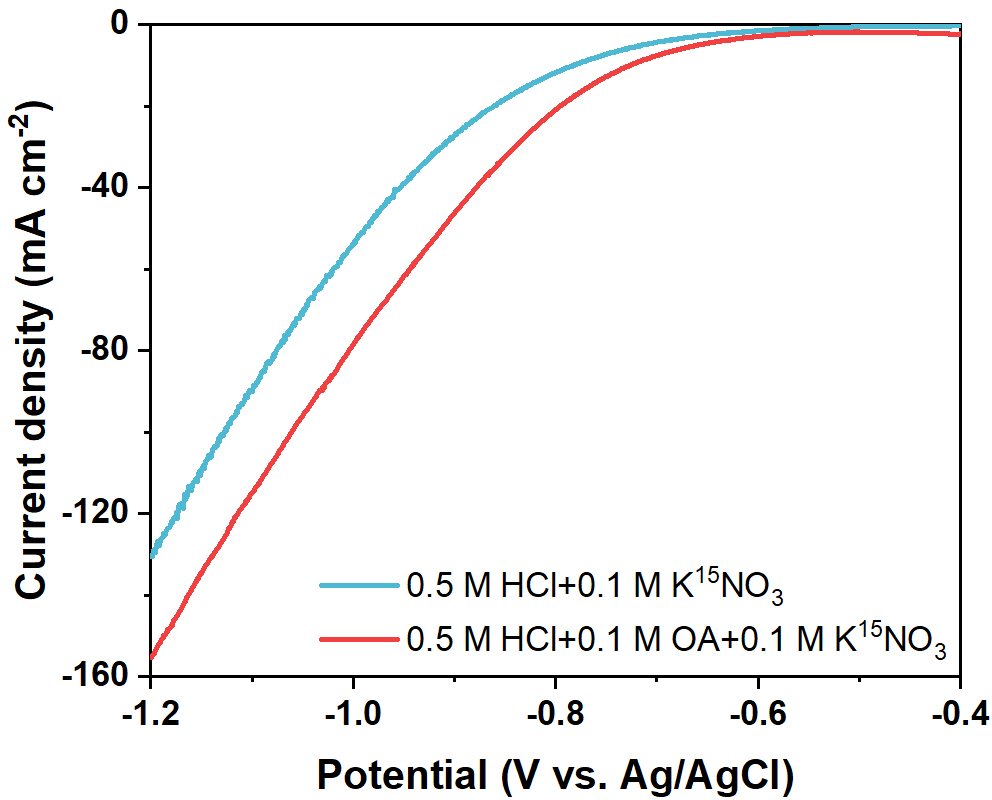


**Supplementary Fig. S28.** LSV curves in different electrolytes over Bi-ene with a scan rate of 10 mV s−1.


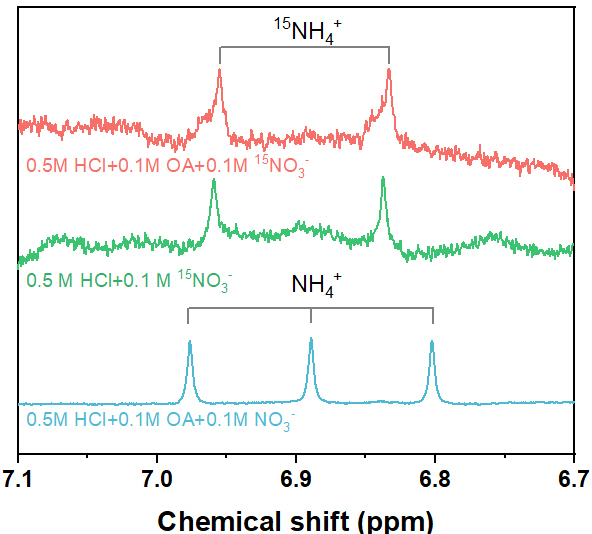


**Supplementary Fig. S29.** 1H NMR spectra of the electrolytes with NO3− and 15NO3−.


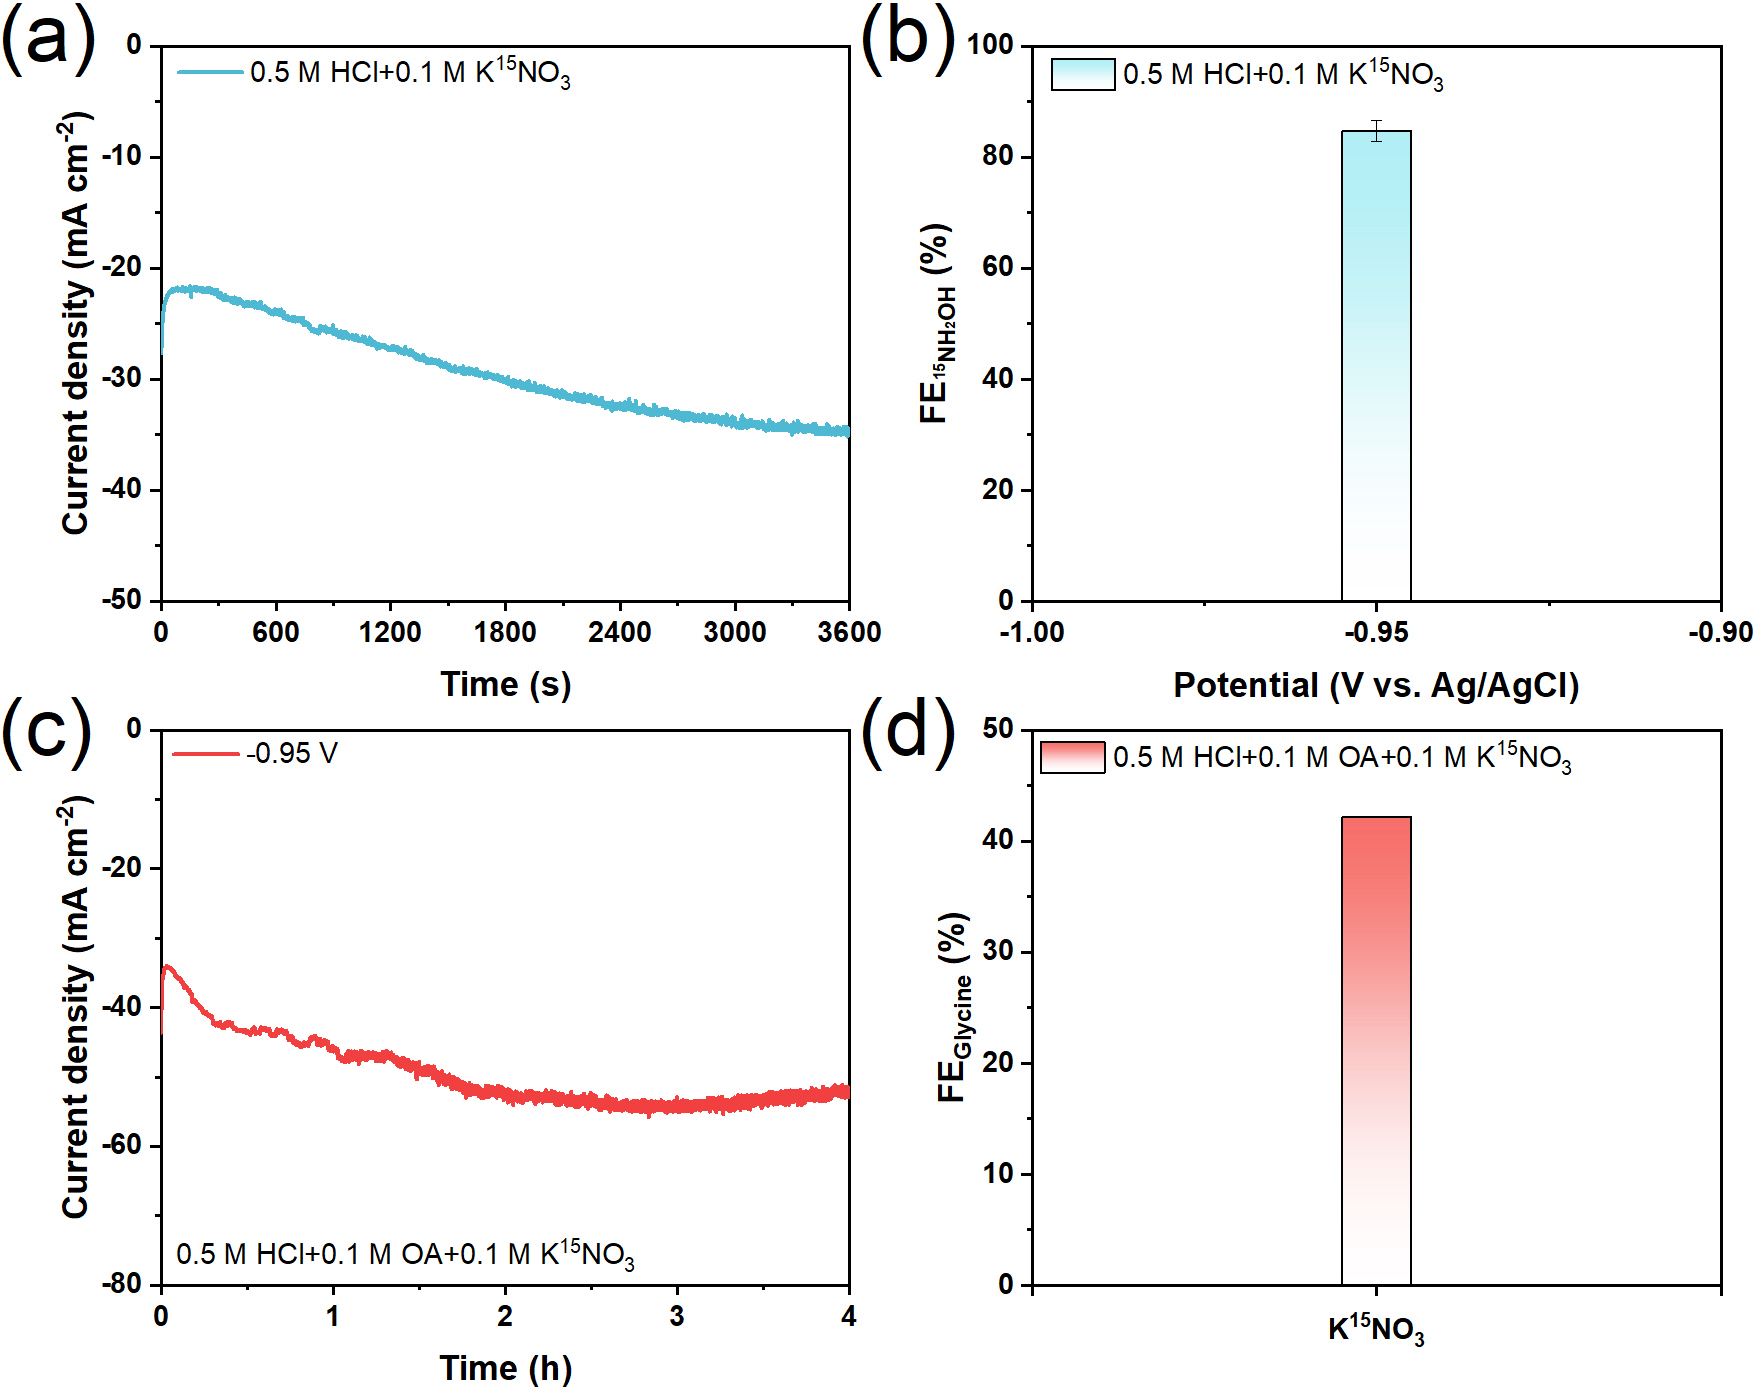


**Supplementary Fig. S30.** I-t curves and corresponding FEs using electrolytes with 15NO3−: (a-b) NH2OH and (c-d) glycine.


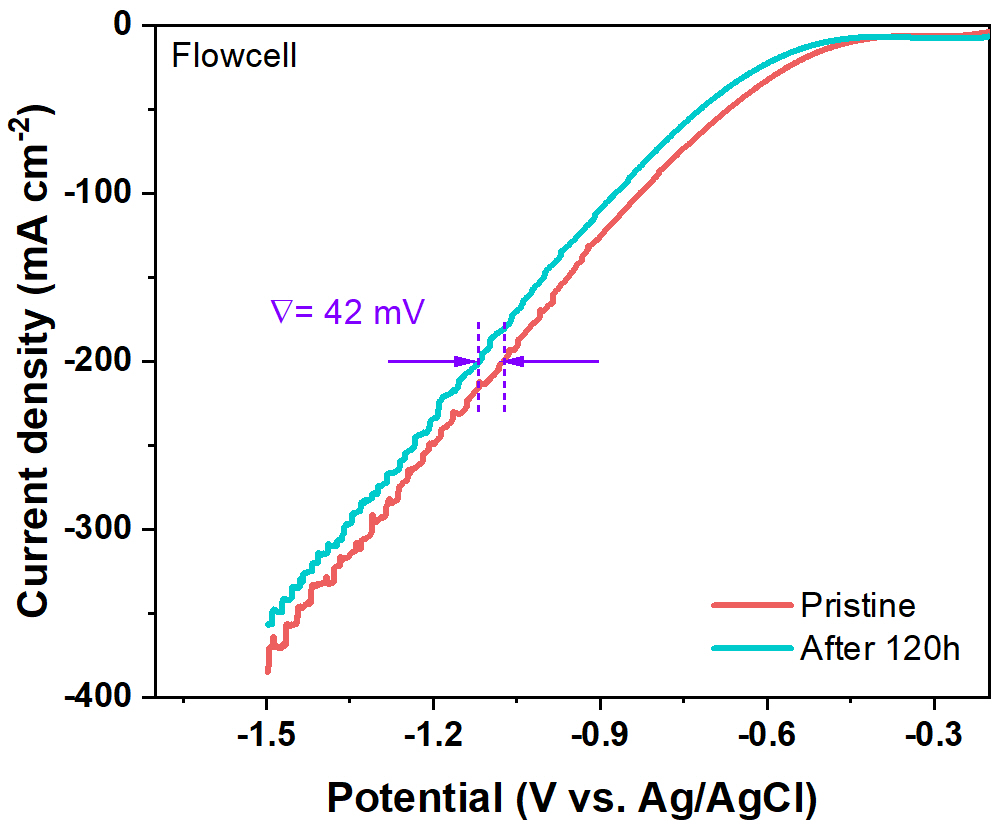


**Supplementary Fig. S31.** LSV curves recorded before and after a long-term stability test for 120 h over the Bi-ene catalyst. To assess its application potential, a flowing reactor was assembled using a gas-diffusion layer (GDL)-supported Bi-ene as the working electrode, eliminating the need for electrolyte replacement during the extended electrolysis.


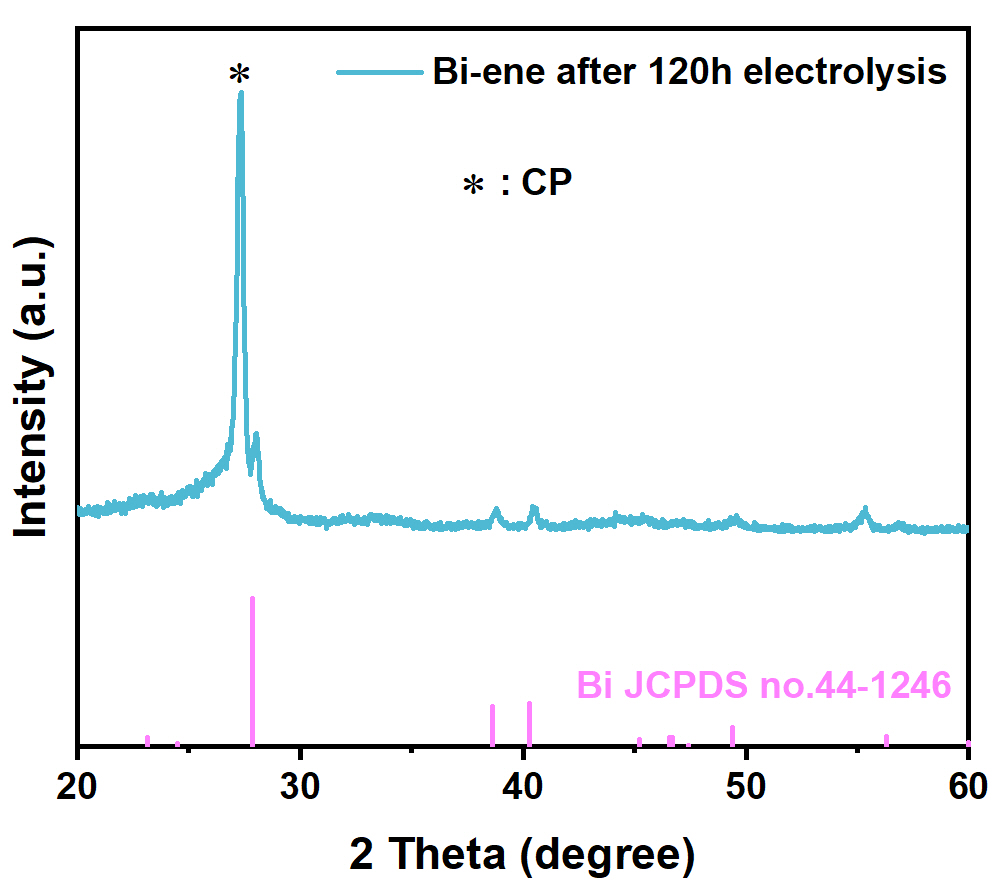


**Supplementary Fig. S32.** XRD pattern of Bi-ene after the stability test.


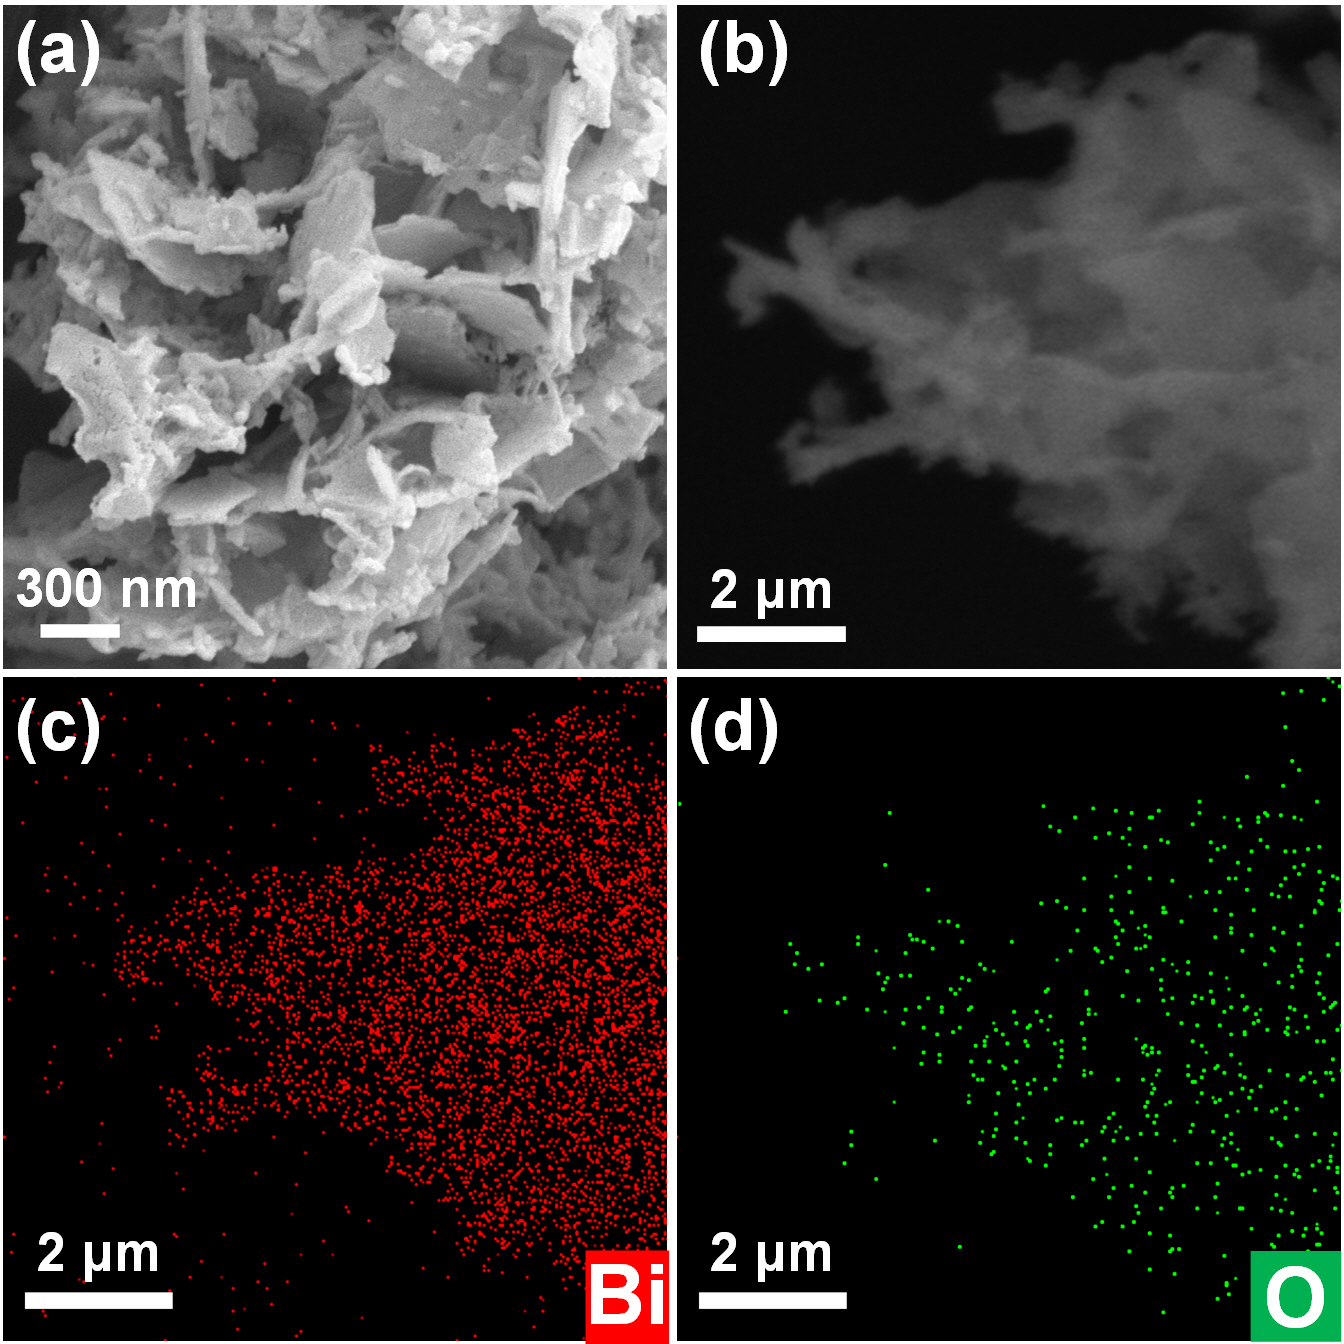


**Supplementary Fig. S33.** SEM images of Bi-ene after the stability test.


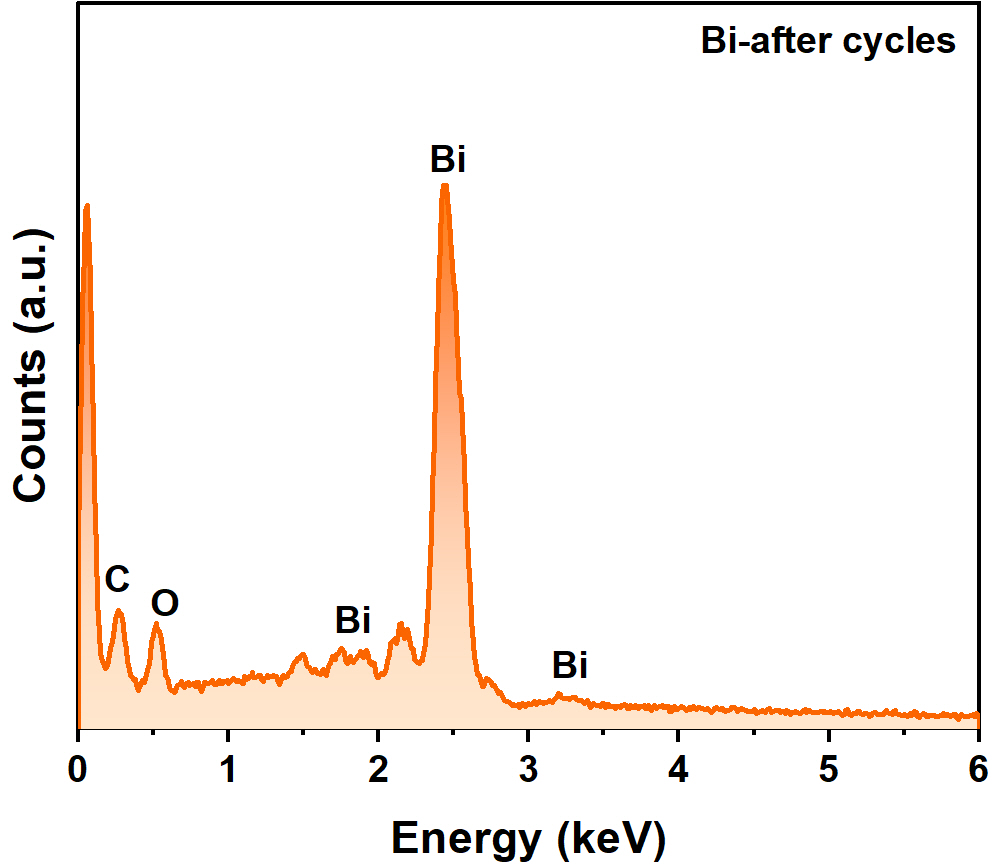


**Supplementary Fig. S34**. EDX spectrum of Bi-ene after the stability test.


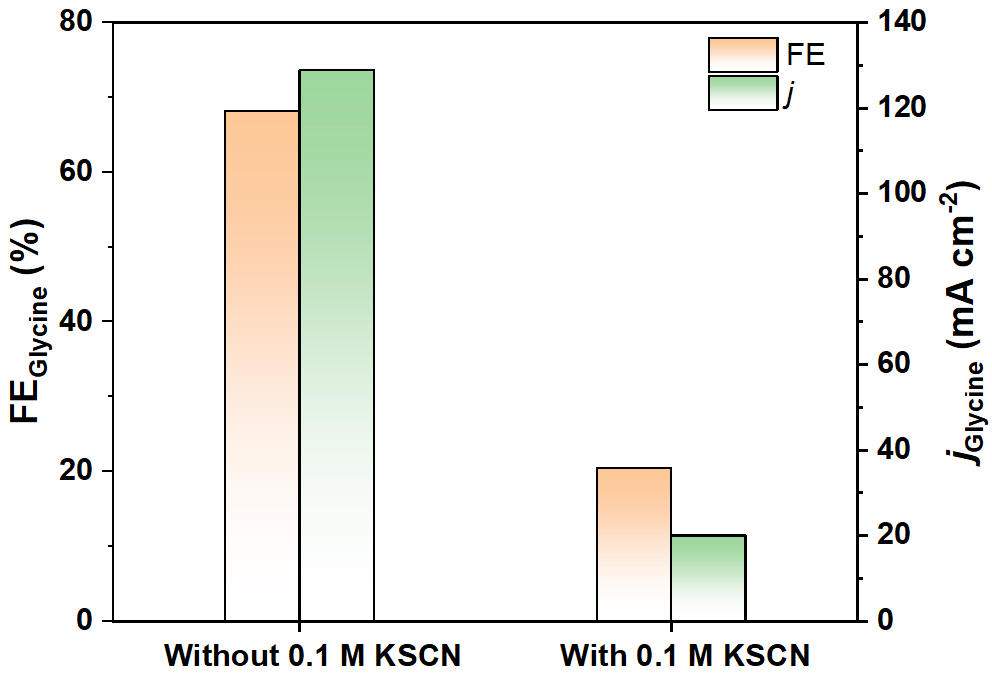


**Supplementary Fig. S35.** The FE and current density of glycine over Bi-ene at −0.95 V with and without 0.1 M KSCN in the electrolyte.


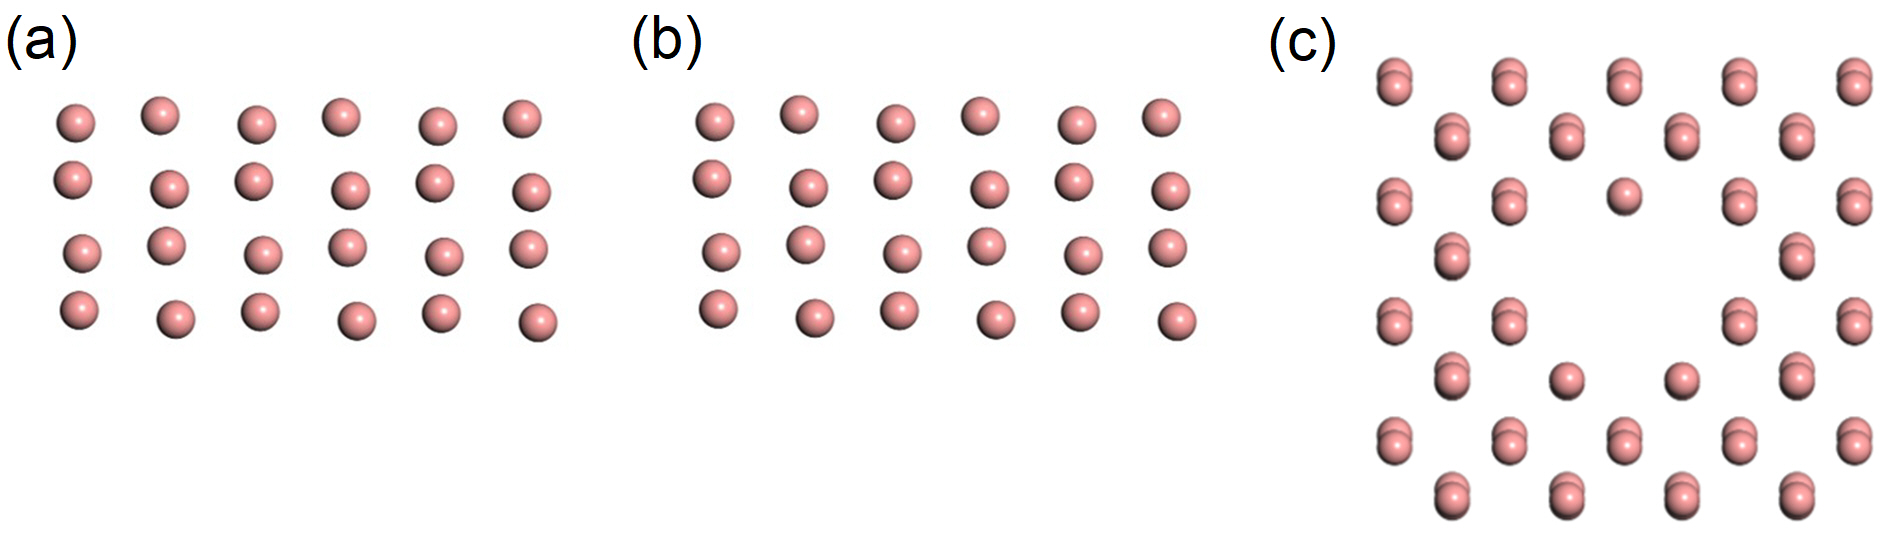


**Supplementary Fig. S36.** Atomic models of (a) Bi (012) plane, (b) Bi (012) edge, and (c) Bi (012) plane with defects.


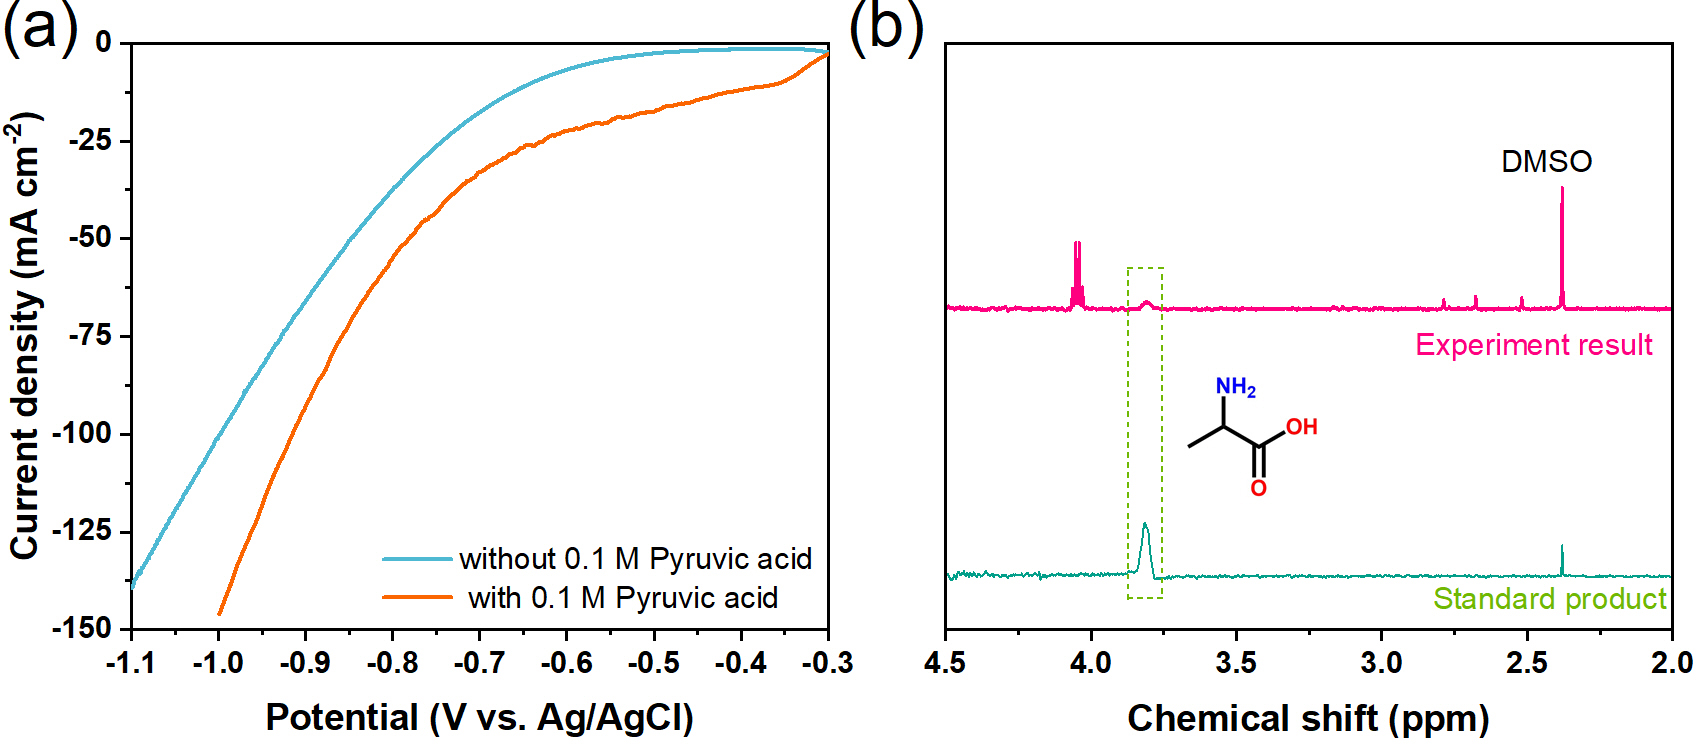


**Supplementary Fig. S37.** (a) LSV curves and (b) 1H NMR spectrum of electrolyte after 2 h electrocatalytic synthesis of alanine at −50 mA cm−2 using Bi-ene electrode.


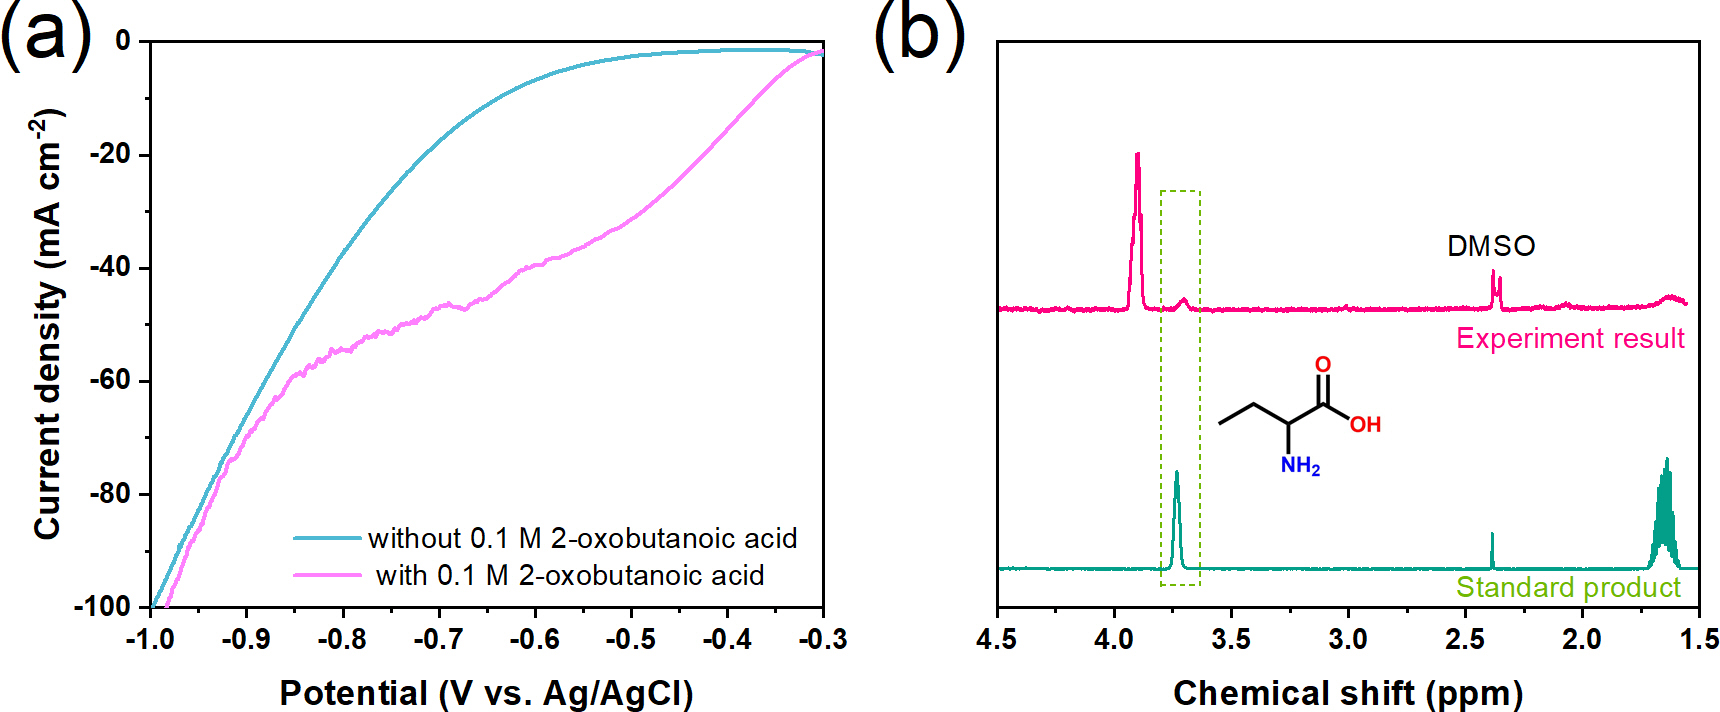


**Supplementary Fig. S38.** (a) LSV curves and (b) 1H NMR spectrum of electrolyte after 2 h electrocatalytic synthesis of 2-aminobutyric acid at −50 mA cm−2 using Bi-ene electrode.


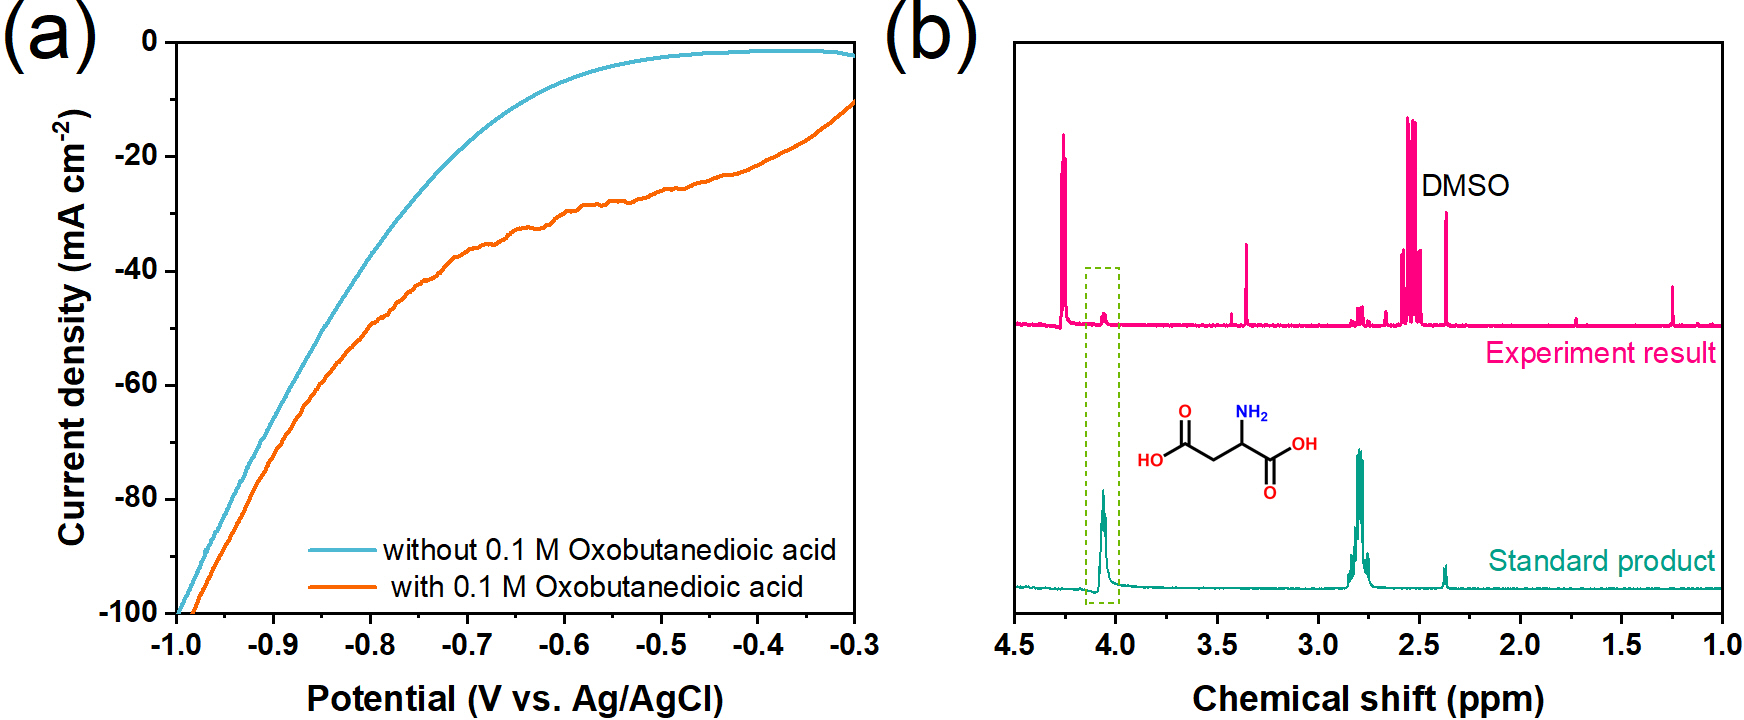


**Supplementary Fig. S39.** (a) LSV curves and (b) 1H NMR spectrum of electrolyte after 2 h electrocatalytic synthesis of aspartic acid at −50 mA cm−2 using Bi-ene electrode.


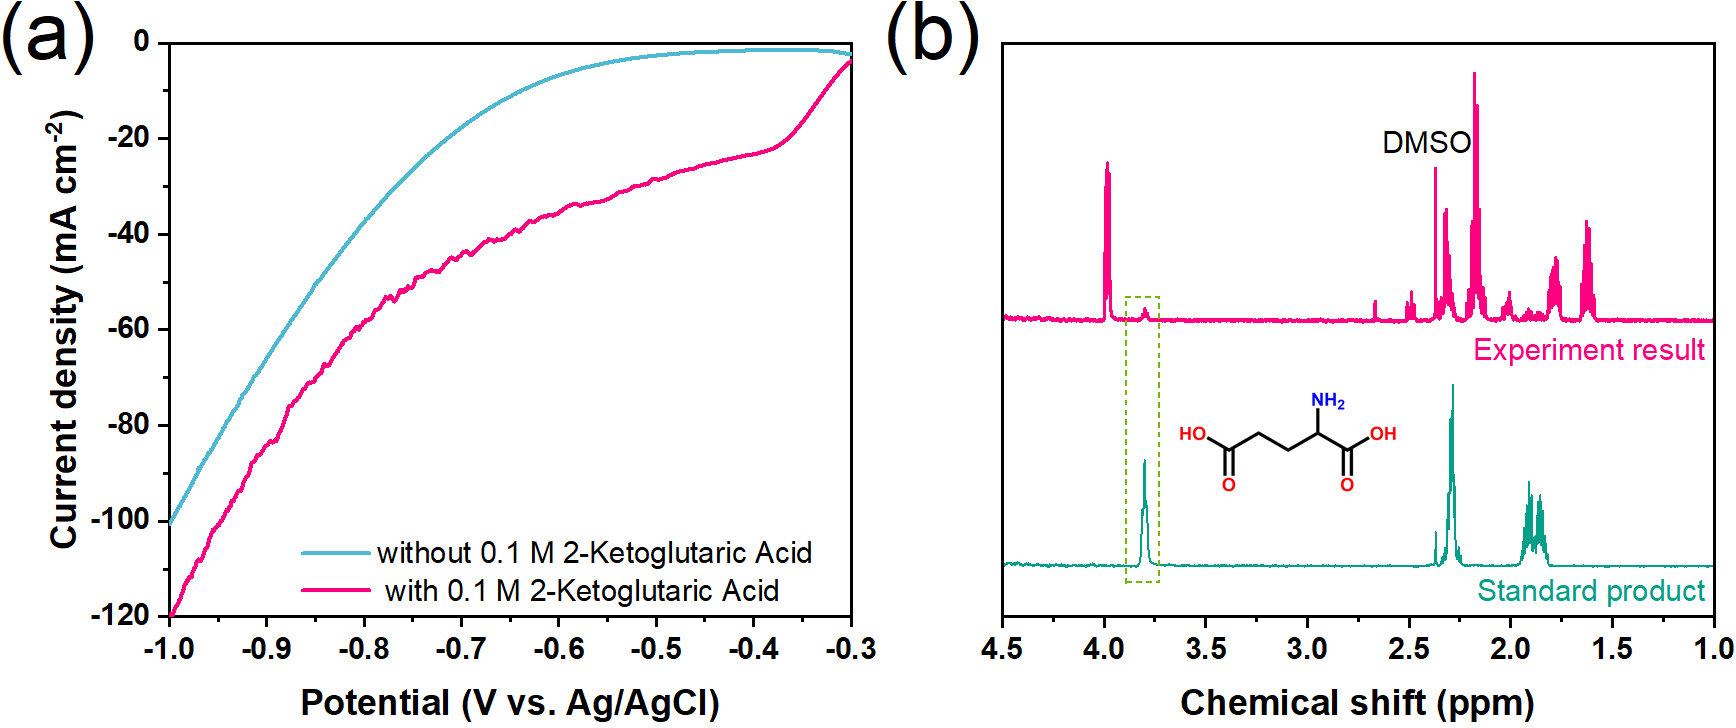


**Supplementary Fig. S40.** (a) LSV curves and (b) 1H-NMR spectrum of electrolyte after 2 h electrocatalytic synthesis of glutamic acid at −50 mA cm−2 using Bi-ene electrode.


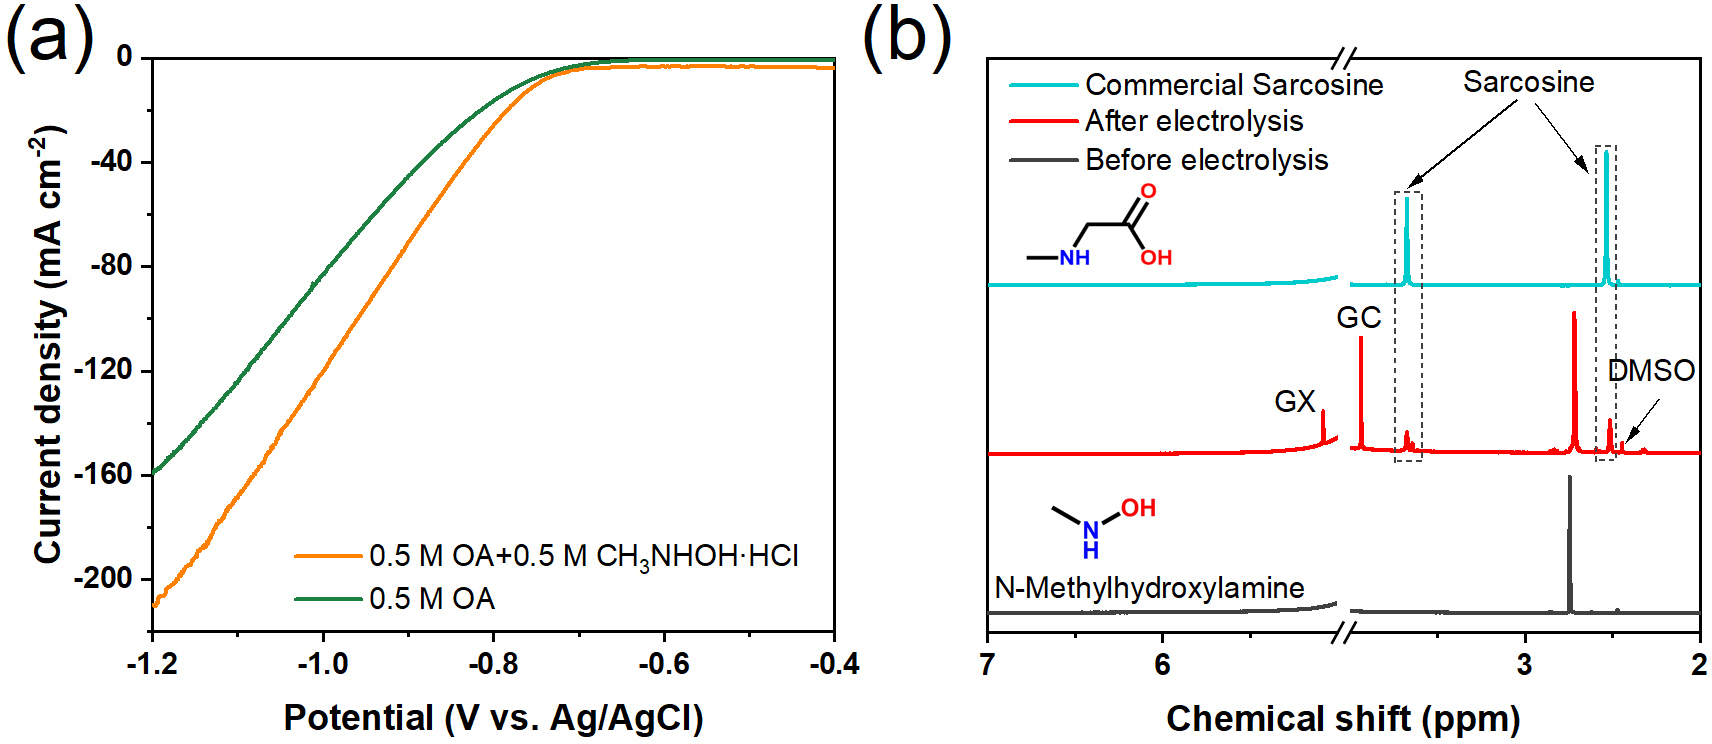


**Supplementary Fig. S41.** (a) LSV curves and (b) 1H NMR spectrum of electrolyte after 4 h electrocatalytic synthesis of sarcosine at −0.8 V using Bi-ene electrode.


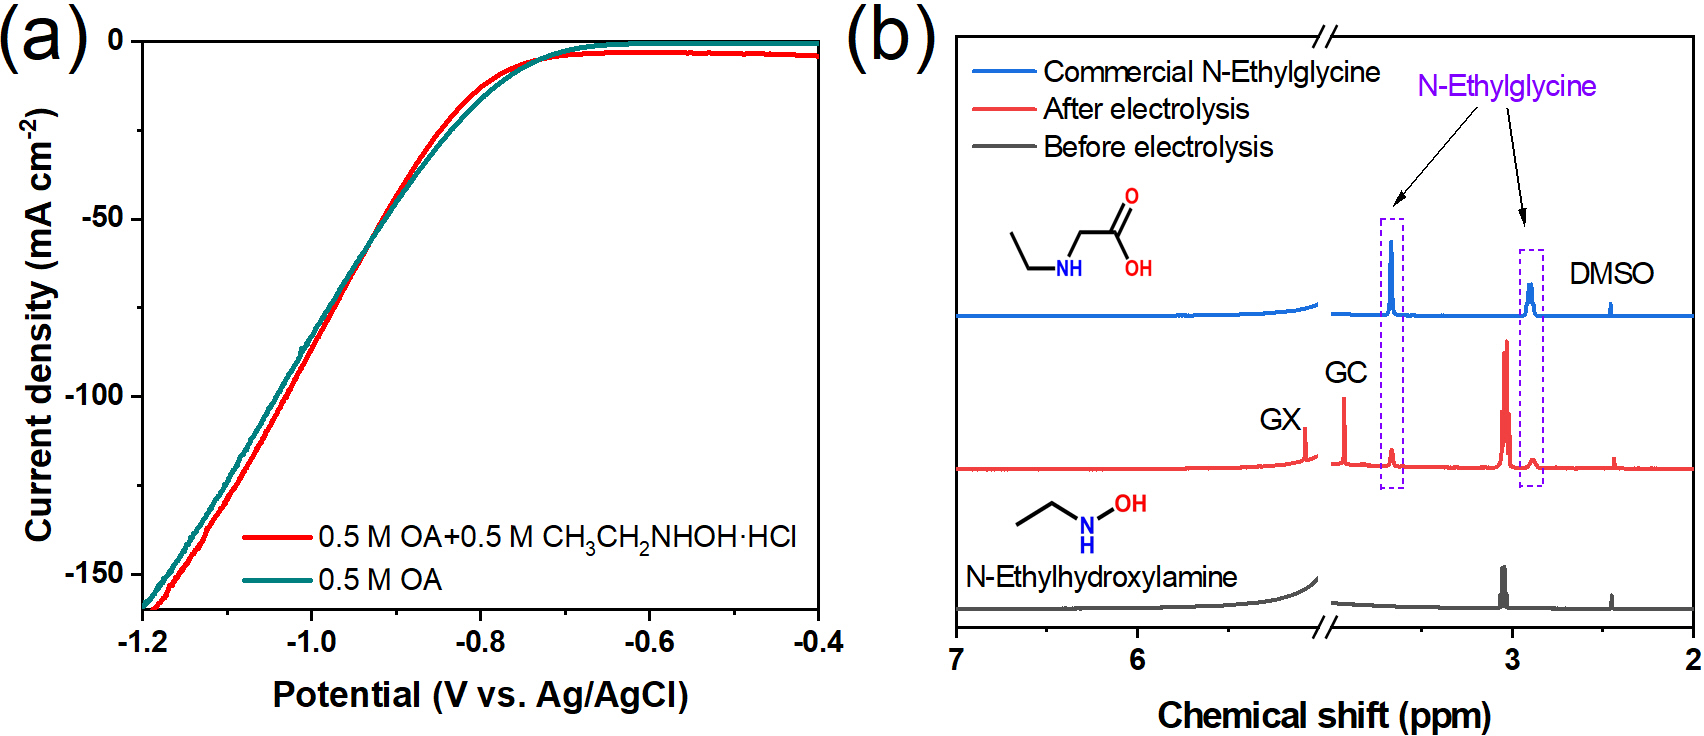


**Supplementary Fig. S42.** (a) LSV curves and (b) 1H NMR spectrum of electrolyte after 4 h electrocatalytic synthesis of N-ethylglycine at −0.9 V using Bi-ene electrode.


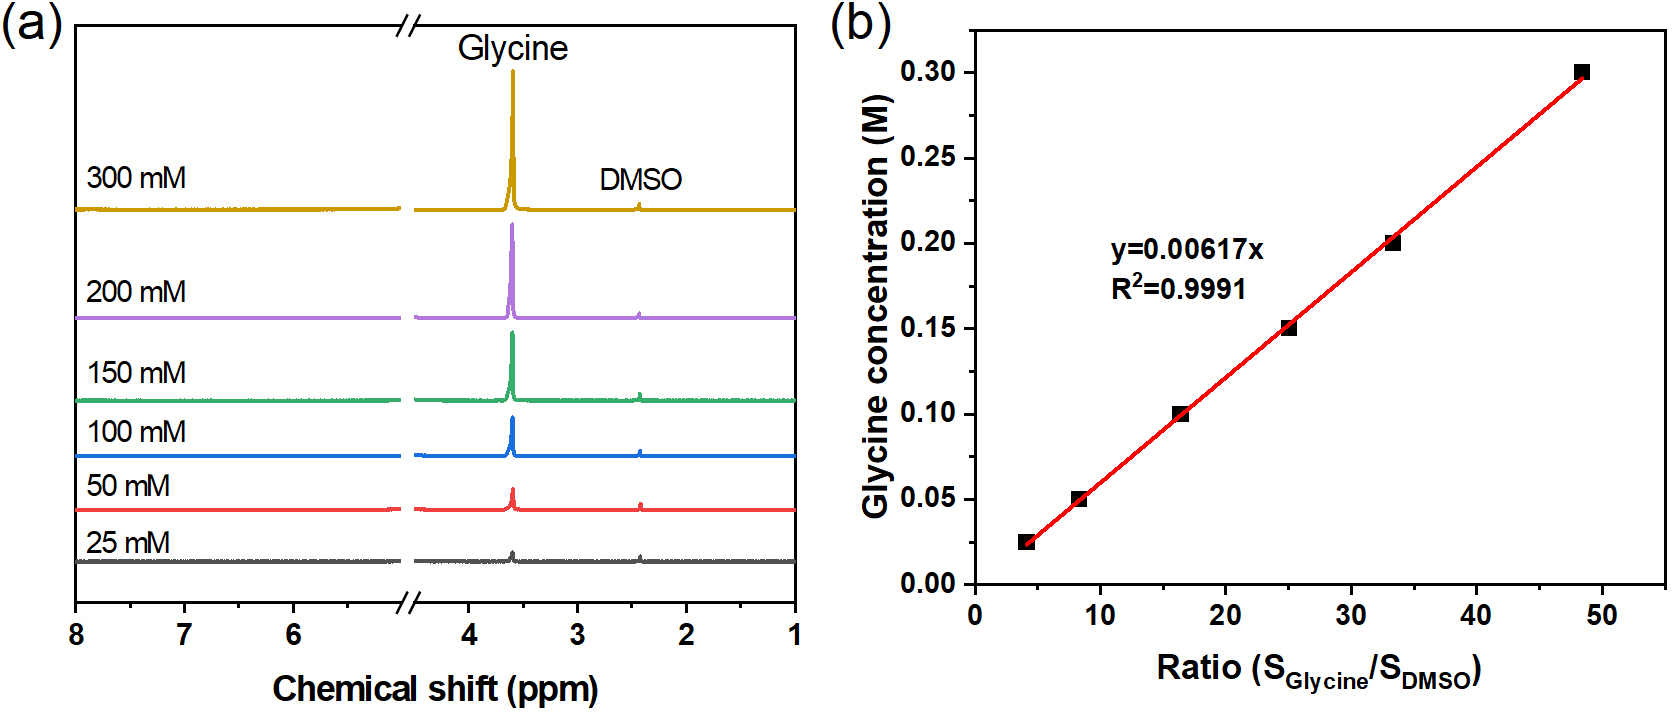


**Supplementary Fig. S43.** (a) Standard 1H NMR spectra obtained for glycine at various concentrations were used to construct calibration profiles. (b) The resulting linear calibration plot served as the basis for quantifying glycine.


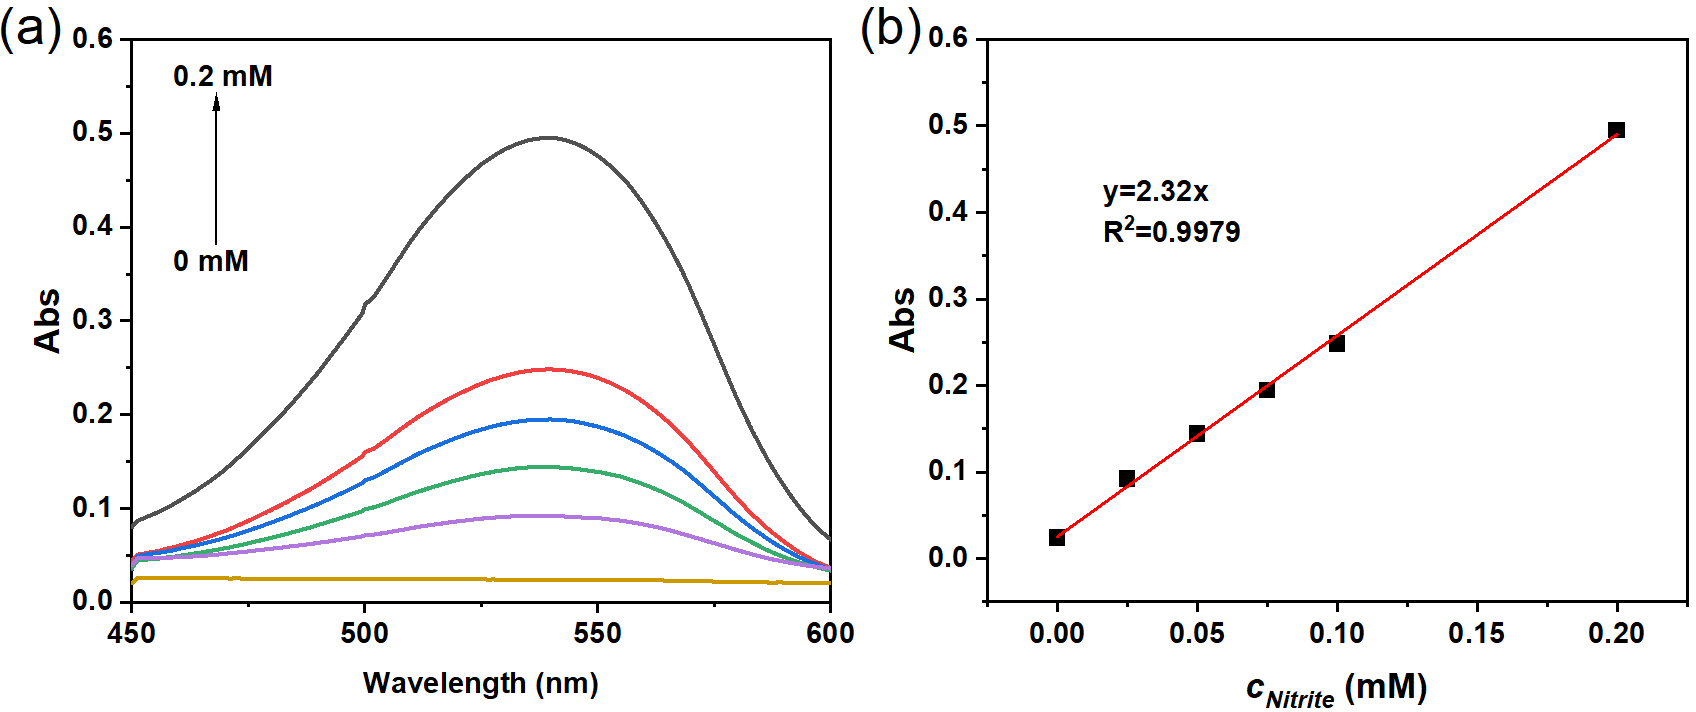


**Supplementary Fig. S44**. NO2− determination by a colorimetric method. (a) UV-Vis absorption spectra. (b) The calibration curve of NO2−.


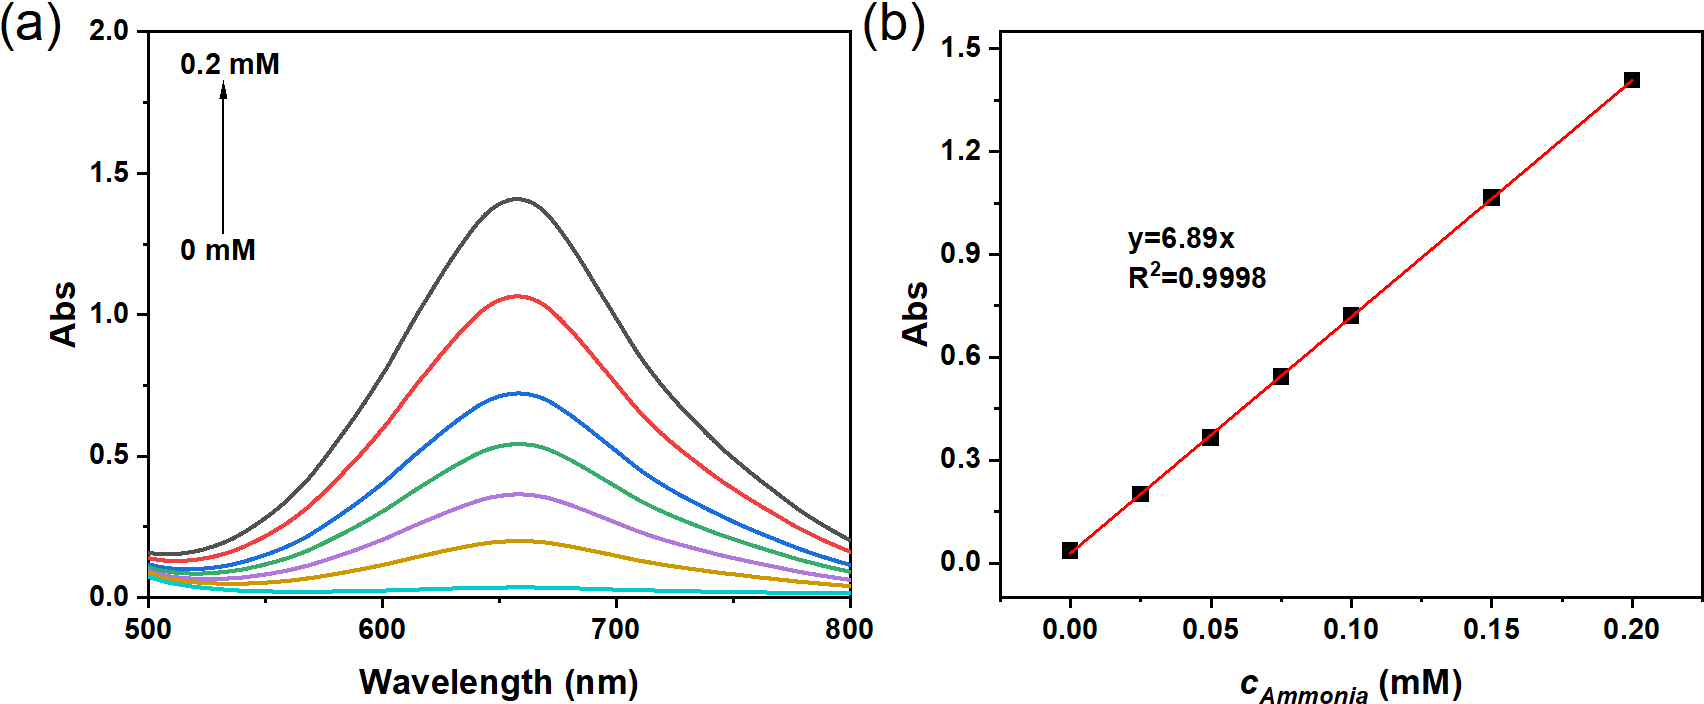


**Supplementary Fig. S45**. NH4+ determination by a colorimetric method. (a) UV-Vis absorption spectra. (b) The calibration curve of NH4+.

**Table S1.** Comparison of the electrocatalytic NtrRR performance of Bi-ene with reported electrocatalysts.

| Electrocatalysts | N source | FEof NH2OH  (%) | Yield rate of NH2OH  (μmol cm-2 h-1) | Refs. |
| --- | --- | --- | --- | --- |
| Bi-ene | **0.5 M HCl+0.5 M HNO3** | **95.7** | **1161.4** | **This work** |
| Bi film/CFP | 0.5 M H2SO4+0.1 M HNO3 | 81.0 | 713.1 | 1 |
| Fe-PANI-AC-2 | 18% NO | 63 | 119.9 | 2 |
| FeSalen-C | 18% NO | 43 | 46.0 | 3 |
| FePc(0.3)/AC | 10% NO | 80 | 60 | 3 |
| FeNC-dry-0.5 | 10% NO | 71 | 215 | 4 |
| Cu-MnO2Hx | 0.5 M K2SO4 + 0.2 M NO3+ 0.2 M Acetone | 91.1 | 396.6 | 5 |
| WC | 100% NO | 58 | 153 | 6 |
| ZnPc MDE (H) | 1.0 M KOH+ 1.0 M KNO3 | 53 | 1725.7 | 7 |

**Table S2.** Comparison of electrocatalytic synthesis of glycine.

| Electrocatalysts | N source | FE of glycine  (%) | Potential  (V vs. Ag/AgCl) | Refs. |
| --- | --- | --- | --- | --- |
| Bi-ene | **0.5 M HCl+0.5 M HNO3**  **+0.5 M OA** | **68.2** | **−0.95** | **This work** |
| Fe−N−C-700 | 0.5 M NaNO3+0.5 M OA | 64.2 | **−**0.9  (vs. RHE) | 8 |
| Cu-Hg | 15wt% H2SO4+0.25 M NaNO3+0.25 M OA | 43.1 | **−**1.4 | 9 |
| PbSn0.5Bi0.125 | 1.5 M H2SO4+0.25 M NaNO3  +0.25 M OA | 57.2 | **−**1.5 | 10 |

**References**

1. Kong X*, et al.* Synthesis of hydroxylamine from air and water via a plasma-electrochemical cascade pathway. *Nat. Sustain.* **7**, 652-660 (2024).

2. Daems N, Sheng X, Alvarez-Gallego Y, Vankelecom IFJ, Pescarmona PP. Iron-containing N-doped carbon electrocatalysts for the cogeneration of hydroxylamine and electricity in a H2–NO fuel cell. *Green Chem.* **18**, 1547-1559 (2016).

3. Sheng X*, et al.* Carbon-supported iron complexes as electrocatalysts for the cogeneration of hydroxylamine and electricity in a NO-H2 fuel cell: A combined electrochemical and density functional theory study. *J. Power Sources* **390**, 249-260 (2018).

4. Kim DH*, et al.* Selective electrochemical reduction of nitric oxide to hydroxylamine by atomically dispersed iron catalyst. *Nat. Commun.* **12**, 1856 (2021).

5. Guo C, Guo M, Zhang Y, Han S, Yu Y. Lattice Hydrogen Involved Electrocatalytic Nitrate Reduction to Hydroxylamine. *J. Am. Chem. Soc.* **147**, 14869-14877 (2025).

6. Bathia ML, Watkinson AP. Hydroxylamine production by electroreduction of nitric oxide in a trickle bed cell. *Can. J. Chem. Eng.* **57**, 631-637 (1979).

7. Tang Y*, et al.* Selective electrosynthesis of hydroxylamine from aqueous nitrate/nitrite by suppressing further reduction. *Nat. Commun.* **15**, 9800 (2024).

8. Cheng Y*, et al.* Highly Efficient Electrosynthesis of Glycine over an Atomically Dispersed Iron Catalyst. *J. Am. Chem. Soc.* **146**, 10084-10092 (2024).

9. Kim JE*, et al.* Electrochemical Synthesis of Glycine from Oxalic Acid and Nitrate. *Angew. Chem. Int. Ed.* **60**, 21943-21951 (2021).

10. Wang K, Li P, Zhang B. Industrial-grade electrocatalytic synthesis of glycine from oxalic acid and nitrate using a porous PbSnBi catalyst. *Appl. Catal B-Environ.* **361**, 124653 (2025).
